# Supplementary material for: Evaluation of the Cleveland Clinic Score for predicting acute kidney injury across different elective cardiac surgeries—a retrospective study
Source: PeerJ. 2026 Jan 15;14:e20533. doi: 10.7717/peerj.20533 (PMC12812272; doi:10.7717/peerj.20533)
Supplement: Supplemental Information 1 [file peerj-14-20533-s001.xlsx]

## Sheet: Arkusz1
Age	>65	>70	Sex (Male 1, Female 0)	Asthma/COPD	Obstructive sleep apnea	Arterial hypertension	Diabetes mellitus	Impaired Glucose Tolerance	With insulin treatment	Chronic kidney injury	Dialysis	Other kidney diseases (cyst, nephrolithiasis)	Atrial fibrillation	Anemia	Coronary artery disease	Carotid Artery Disease	Peripheral artery disease	Stroke	Smoking history	pCO2 preoperative	pO2 preoperative	Weight	BMI	BMI>30	LVEF	LVEF=<35	Creatinine before surgery [umol/l]	Creatinine maximum level (µmol/l)	eGFR	EuroSCORE	CABG	CABG+AVR/AVP	CABG+CAS	MIDCAB	AVR/AVP	AVR/AVP+reoperation	AVR/AVP+LAAO	MVR/MVP	Bental de bono	Length of intensive care unit stay (days)	Length of hospital stay (days)	Return to intensive care unit	Transfusions on intensive care unit	Rethoracotomy	Pulmonary complications	Respiratory failure	NIV	Pleural fluid	Reintubation
74	1	1	1	1	0	1	1	0	0	0	0	0	0	0	0	0	0	0	1	34.5	80.8	78	27.31	0	50	0	98	139	63	1.52	1	0	0	0	0	0	0	0	0	1	7	0	1	0	0	0	0	0	0
72	1	1	1	0	0	1	0	0	0	0	0	1	0	0	0	0	0	0	0	37.4	94.6	91	30.06	1	50	0	108	155	45	2.48	1	0	0	0	0	0	0	0	0	4	3	0	1	0	0	0	0	0	0
47	0	0	1	0	0	1	1	0	0	1	1	0	0	0	1	0	0	0	0	48.4	105	110	33.3	1	40	0	327	469	15	2.51	1	0	0	0	0	0	0	0	0	13	7	0	1	0	1	1	0	0	0
70	1	0	1	0	0	1	0	0	0	1	0	0	0	0	1	0	0	0	0	35.9	82.6	88	29.75	0	45	0	109	127	52	1.22	1	0	0	0	0	0	0	0	0	1	4	0	1	0	0	0	0	0	0
71	1	1	1	0	0	1	0	0	0	0	0	0	0	0	1	0	0	0	0	33.3	90	100	32.28	1	55	0	98	88	87	0.76	1	0	0	0	0	0	0	0	0	1	9	0	1	0	0	0	0	0	0
58	0	0	1	0	0	1	0	1	0	0	0	0	0	0	1	0	0	0	1	35.4	96.5	82	28.37	1	45	0	87	93	87	0.68	1	0	0	0	0	0	0	0	0	3	3	0	1	0	0	0	0	0	0
65	0	0	1	0	0	1	0	0	0	0	0	0	0	0	1	1	0	1	0	35.3	88.2	79	29	0	63	0	86	87	84	2.52	0	0	1	0	0	0	0	0	0	1	5	0	1	0	0	0	0	0	0
58	0	0	0	0	0	1	0	0	0	0	0	1	0	0	1	0	0	0	0	32.7	107	55	19.26	0	60	0	80	75	106	0.69	1	0	0	0	0	0	0	0	0	8	6	0	1	0	0	0	0	0	0
67	1	0	1	0	0	1	1	0	0	0	0	0	0	0	1	0	0	0	0	36.3	96.7	60	22.23	0	30	1	102	131	66	2.03	1	0	0	0	0	0	0	0	0	2	5	0	1	0	0	0	0	0	0
68	1	0	0	0	0	1	0	0	0	0	0	0	0	0	1	0	0	0	1	35.8	71.9	97	33.39	1	50	0	78	86	60	1.59	1	0	0	0	0	0	0	0	0	4	4	0	1	0	0	0	0	0	0
65	0	0	1	0	0	1	1	0	0	0	0	0	0	0	1	0	0	1	1	38	80.9	170	38.06	1	55	0	54	65	102	0.64	1	0	0	0	0	0	0	0	0	1	4	0	0	0	0	0	0	0	0
65	0	0	1	0	0	1	1	0	0	0	0	0	0	0	1	0	0	0	0	37.9	98.6	94	30.8	1	60	0	70	67	100	0.64	1	0	0	0	0	0	0	0	0	1	9	0	0	0	0	0	0	0	0
80	1	1	1	0	0	1	1	0	1	1	0	0	0	1	1	0	0	0	0	34.2	89	94	32.19	1	45	0	115	135	46	4.38	1	0	0	0	0	0	0	0	0	1	7	0	1	0	0	0	0	0	0
72	1	1	0	0	0	1	0	0	0	0	0	0	0	0	0	1	0	0	0	36.1	91.5	73	30.39	1	60	0	76	97	51	3.79	0	1	0	0	0	0	0	0	0	2	5	0	0	0	0	0	0	0	0
63	0	0	1	0	0	1	1	0	0	0	0	0	0	0	1	0	0	1	0	37.7	76.5	102	35.71	1	60	0	90	150	52	1.41	0	1	0	0	0	0	0	0	0	2	5	0	0	0	0	0	0	0	0
76	1	1	1	0	0	1	1	0	0	0	0	0	0	0	1	0	0	0	0	38.6	98.9	74	28.2	0	65	0	121	190	32	2.04	1	0	0	0	0	0	0	0	0	4	3	0	1	1	0	0	0	0	0
73	1	1	1	1	0	0	0	0	0	1	0	0	0	0	1	0	0	0	1	40.5	80.7	56	21.45	0	45	0	110	158	56	1.48	1	0	0	0	0	0	0	0	0	2	12	0	1	1	0	0	0	0	0
59	0	0	0	0	0	1	0	0	0	0	0	0	0	0	1	0	0	0	0	38	95.2	56	22.6	0	70	0	62	55	102	0.69	1	0	0	0	0	0	0	0	0	1	7	0	1	0	0	0	0	0	0
61	0	0	0	0	0	1	0	1	0	0	0	0	0	0	1	0	0	0	1	31.5	92.3	66	28.26	0	33	1	76	78	105	0.97	1	0	0	0	0	0	0	0	0	6	8	0	1	0	0	0	0	0	0
59	0	0	1	1	0	1	1	0	0	1	0	0	1	0	1	1	0	1	1	40.1	79.6	80	31.64	1	50	0	166	448	50	2.09	1	0	0	0	0	0	0	0	0	14	200	1	1	1	1	1	1	0	1
65	0	0	1	0	0	1	0	1	0	0	0	0	0	0	1	0	0	0	0	31.4	111	73	27.66	0	25	1	80	121	93	1.42	1	0	0	0	0	0	0	0	0	1	17	0	1	0	1	0	0	1	0
54	0	0	1	0	0	1	0	0	0	0	0	0	0	0	1	0	0	0	1	38.9	77.7	102	29.8	0	62	0	72	85	102	0.55	1	0	0	0	0	0	0	0	0	1	6	0	0	0	0	0	0	0	0
74	1	1	1	0	0	1	1	0	1	0	0	1	0	0	1	1	0	1	0	35.9	79.6	100	32.15	1	55	0	89	101	72	4.55	0	1	0	0	0	0	0	0	0	4	14	0	0	0	0	0	0	0	0
76	1	1	0	0	0	1	0	0	0	0	0	0	0	0	1	0	0	0	0	39.1	86.3	80	31.22	1	60	0	75	72	86	1.08	1	0	0	0	0	0	0	0	0	2	6	0	1	0	0	0	0	0	0
72	1	1	1	0	0	1	0	0	0	0	0	1	0	0	1	0	0	1	0	36.6	78.9	74	24.06	0	35	1	97	92	88	1.06	1	0	0	0	0	0	0	0	0	1	7	0	0	0	0	0	0	0	0
66	1	0	1	0	0	1	1	0	0	0	0	0	0	0	1	0	0	0	1	35.1	87.1	84	29.8	0	45	0	102	92	82	1.21	1	0	0	0	0	0	0	0	0	1	10	0	0	0	0	0	0	0	0
65	0	0	1	0	0	1	0	1	0	0	0	0	0	0	1	0	0	0	1	33.8	86.9	92	30.74	1	48	0	97	88	92	0.87	1	0	0	0	0	0	0	0	0	1	7	0	0	0	0	0	0	0	0
65	0	0	1	0	0	0	0	0	0	0	0	1	0	0	1	1	0	0	0	39.2	81.7	87	30.82	1	53	0	71	93	90	1.09	1	0	0	0	0	0	0	0	0	3	4	0	1	0	0	0	0	0	0
71	1	1	1	0	0	1	1	0	0	0	0	1	0	0	1	1	0	0	0	37.8	86.6	89	31.83	1	50	0	66	66	95	1.76	1	0	0	0	0	0	0	0	0	4	6	0	1	0	0	0	0	0	0
69	1	0	1	0	0	1	1	0	0	0	0	1	0	0	1	0	0	0	0	40.4	97.1	77	24.77	0	45	0	81	76	89	0.98	1	0	0	0	0	0	0	0	0	2	5	0	1	1	0	0	0	0	0
65	0	0	1	0	0	1	1	0	1	0	0	1	1	0	1	0	0	0	0	39.6	87.3	105	33.9	1	60	0	68	75	95	1.1	1	0	0	0	0	0	0	0	0	1	8	0	0	0	0	0	0	0	0
49	0	0	1	0	0	1	0	1	0	0	0	0	0	0	1	0	0	0	0	34.1	105	82	26.17	0	50	0	81	98	78	0.67	1	0	0	0	0	0	0	0	0	2	4	0	0	0	0	0	0	0	0
71	1	1	0	1	0	0	0	0	0	0	0	1	0	0	1	0	0	0	1	42.7	65.1	73	28.88	0	55	0	56	57	90	0.94	1	0	0	0	0	0	0	0	0	1	6	0	1	1	0	0	0	0	0
54	0	0	1	0	0	1	0	0	0	0	0	0	0	0	1	0	0	0	0	39.9	86.9	93	25.31	0	55	0	88	147	98	0.5	1	0	0	0	0	0	0	0	0	1	5	0	0	0	0	0	0	0	0
67	1	0	1	0	0	1	0	0	0	0	0	0	0	0	1	0	1	0	0	37	69.3	106	31.7	1	50	0	71	66	103	1.57	1	0	0	0	0	0	0	0	0	3	3	0	1	0	0	0	0	0	0
65	0	0	1	0	0	1	0	0	0	0	0	0	0	0	1	0	0	0	1	38	104	77	27.61	0	66	0	72	81	95	0.64	1	0	0	0	0	0	0	0	0	1	6	0	1	0	0	0	0	0	0
62	0	0	1	1	1	1	1	0	1	0	0	0	0	0	1	0	0	0	0	32.3	72.5	114	36.56	1	50	0	58	53	112	1.37	1	0	0	0	0	0	0	0	0	3	4	0	0	0	1	0	1	0	0
65	0	0	1	0	0	1	0	1	0	0	0	0	0	0	1	0	0	0	0	36.8	90.8	83	28	0	38	0	56	56	121	0.87	1	0	0	0	0	0	0	0	0	4	7	0	0	0	0	0	0	0	0
82	1	1	1	0	0	1	0	0	0	0	0	0	0	0	1	0	0	1	0	33.6	106	93	33.35	1	60	0	75	146	80	1.4	1	0	0	0	0	0	0	0	0	29	0	0	1	0	1	0	1	0	1
55	0	0	1	0	0	1	1	0	1	1	0	0	0	0	1	0	0	0	0	35.6	101	81.6	27.68	0	60	0	107	339	59	1.07	1	0	0	0	0	0	0	0	0	1	7	0	1	0	0	0	0	0	0
73	1	1	0	0	0	1	1	0	0	1	0	0	0	0	1	0	0	0	0	38.9	83.1	57	23.31	0	64	0	80	104	82	1.35	1	0	0	0	0	0	0	0	0	2	7	0	1	0	0	0	0	0	0
75	1	1	0	0	0	1	1	0	1	0	0	0	1	0	1	0	0	0	0	38.3	86.2	48	22.94	0	55	0	82	91	90	1.5	1	0	0	0	0	0	0	0	0	4	16	0	1	1	0	0	0	0	0
63	0	0	1	0	0	1	0	0	0	0	0	0	0	0	1	1	1	1	1	47.9	77	80	26.42	0	60	0	73	69	97	2.24	0	1	0	0	0	0	0	0	0	2	5	0	1	0	0	0	0	0	0
67	1	0	1	0	0	1	1	0	0	0	0	1	0	1	1	0	0	0	1	37.7	91.5	99.5	32.28	1	60	0	101	121	91	0.68	1	0	0	0	0	0	0	0	0	2	19	0	1	0	0	0	0	0	0
63	0	0	1	1	1	1	1	0	0	0	0	0	0	0	1	0	0	0	0	38.1	75.8	93	37.18	1	60	0	66	76	100	1.45	0	1	0	0	0	0	0	0	0	1	19	0	1	0	1	0	1	0	0
54	0	0	1	0	0	1	1	0	1	0	0	0	0	0	1	0	0	0	0	37.2	84.3	86	35	1	60	0	70	62	110	0.55	1	0	0	0	0	0	0	0	0	1	5	0	0	0	0	0	0	0	0
70	1	0	0	1	0	0	1	0	0	1	0	1	0	0	1	1	0	0	1	32.9	90.7	53	21.78	0	55	0	129	224	53	4.3	0	0	1	0	0	0	0	0	0	2	34	1	1	0	1	0	0	0	1
66	1	0	0	0	0	1	1	0	1	0	0	0	0	0	1	1	0	0	0	37.4	79.1	80	25.71	0	65	0	56	56	95	2	0	1	0	0	0	0	0	0	0	1	4	0	1	0	0	0	0	0	0
57	0	0	1	0	0	1	1	0	0	0	0	0	0	0	0	1	0	0	0	37.1	86.6	89	29	0	60	0	69	72	99	0.55	1	0	0	0	0	0	0	0	0	1	5	0	1	0	0	0	0	0	0
49	0	0	0	0	0	0	0	0	0	0	0	0	0	0	0	1	0	0	0	33.9	102	70	28.13	0	40	0	53	50	110	1.63	0	1	0	0	0	0	0	0	0	1	6	0	1	0	0	0	0	0	0
69	1	0	1	1	1	1	1	0	0	0	0	0	0	0	0	1	0	0	0	37.1	75.7	115	36.61	1	55	0	90	113	54	1.17	1	0	0	0	0	0	0	0	0	2	5	0	0	0	0	0	0	0	0
64	0	0	1	0	0	1	1	0	0	0	0	0	0	0	0	1	0	0	0	35.1	92.3	78	28.72	0	65	0	97	110	76	0.84	1	0	0	0	0	0	0	0	0	1	7	0	1	0	0	0	0	0	0
68	1	0	1	0	0	1	1	0	0	0	0	1	0	0	0	1	0	0	1	39.7	100	87	34.41	1	55	0	94	90	79	1.13	1	0	0	0	0	0	0	0	0	1	5	0	1	0	0	0	0	0	0
69	1	0	1	0	0	1	1	0	0	0	0	0	0	0	0	1	0	0	0	36.6	91.5	68	25.28	0	60	0	76	82	90	0.72	1	0	0	0	0	0	0	0	0	1	11	0	0	0	0	0	0	0	0
62	0	0	1	0	0	1	0	0	0	0	0	0	0	0	0	1	0	1	0	38.1	87.9	83	25.47	0	55	0	77	109	75	1.35	1	0	0	0	0	0	0	0	0	1	4	0	1	0	0	0	0	0	0
56	0	0	1	0	0	1	0	1	0	0	0	0	0	0	0	1	0	0	0	36.4	81.6	100	33.75	1	43	0	86	94	102	1.18	0	1	0	0	0	0	0	0	0	1	6	0	1	0	0	0	0	0	0
76	1	1	1	0	0	1	1	0	1	0	0	0	1	0	1	0	0	0	0	30.2	87	96	29	0	55	0	95	111	62	1.67	1	0	0	0	0	0	0	0	0	5	4	0	1	0	1	0	0	1	0
69	1	0	1	0	0	1	1	0	0	0	0	1	0	0	1	0	1	0	0	36.9	75.4	63	24	0	55	0	67	74	97	1.22	1	0	0	0	0	0	0	0	0	4	7	0	1	0	0	0	0	0	0
77	1	1	1	0	0	1	0	0	0	1	0	0	0	0	1	0	0	0	0	39	108	94	30	0	65	0	92	165	76	1.21	1	0	0	0	0	0	0	0	0	1	11	0	1	0	1	0	0	1	0
69	1	0	0	1	0	1	0	0	0	0	0	0	0	0	1	0	0	0	0	47	102	58.7	21.77	0	68	0	62	81	84	1.45	1	0	0	0	0	0	0	0	0	4	6	0	1	0	0	0	0	0	0
70	1	0	1	0	0	1	0	1	0	0	0	1	0	0	1	0	0	0	0	39.9	85	84	25.93	0	60	0	84	104	67	1.72	0	1	0	0	0	0	0	0	0	2	6	0	1	1	0	0	0	0	0
78	1	1	1	0	0	1	0	0	0	1	0	0	1	0	1	0	0	0	1	41.4	67.7	64	23.38	0	60	0	122	203	37	5.23	0	1	0	0	0	0	0	0	0	15	5	1	1	0	1	1	0	1	1
67	1	0	1	0	0	1	0	0	0	0	0	0	0	0	1	0	1	0	0	35.1	103	88	35.16	1	47	0	96	126	76	2.12	1	0	0	0	0	0	0	0	0	1	6	0	1	0	0	0	0	0	0
61	0	0	1	1	1	1	1	0	1	0	0	0	0	1	1	0	0	0	1	36	104	95	29.98	0	52	0	90	95	75	1.32	1	0	0	0	0	0	0	0	0	7	4	0	1	0	1	0	1	0	0
71	1	1	0	0	0	1	1	0	0	0	0	1	1	0	1	0	0	0	0	42.8	83.3	55	25.1	0	65	0	82	59	89	0.94	1	0	0	0	0	0	0	0	0	4	3	0	1	0	0	0	0	0	0
75	1	1	0	1	1	1	0	0	0	1	0	0	0	0	1	0	0	0	1	39.8	85.9	90	31.5	1	60	0	73	90	54	1.71	1	0	0	0	0	0	0	0	0	1	5	0	1	0	0	0	0	0	0
72	1	1	1	0	0	1	0	0	0	0	0	0	0	0	1	0	0	0	0	36.5	79.2	84	26.47	0	60	0	82	88	80	1.05	1	0	0	0	0	0	0	0	0	1	6	0	1	0	0	0	0	0	0
60	0	0	1	0	0	1	0	0	0	0	0	0	0	0	1	0	0	0	1	39.9	71.4	93	35.86	1	64	0	68	73	108	0.55	1	0	0	0	0	0	0	0	0	3	8	0	1	0	0	0	0	0	0
74	1	1	1	0	0	1	0	0	0	0	0	0	1	0	1	0	0	0	0	31.2	85	90	27.47	0	25	1	80	115	79	2.96	1	0	0	0	0	0	0	0	0	2	6	0	1	0	0	0	0	0	0
67	1	0	1	0	0	1	1	0	0	0	0	0	0	0	1	0	0	0	1	37.9	70.4	71	22.53	0	45	0	89	89	76	1.25	1	0	0	0	0	0	0	0	0	1	7	0	1	0	0	0	0	0	0
69	1	0	0	0	0	1	0	0	0	0	0	0	0	0	1	0	0	0	0	39.5	83.1	75	24.9	0	60	0	64	77	92	0.72	1	0	0	0	0	0	0	0	0	1	6	0	1	0	0	0	0	0	0
76	1	1	1	0	0	1	0	0	0	0	0	0	0	0	1	0	0	0	0	38.9	76.4	86	31.59	1	60	0	86	111	85	1.18	1	0	0	0	0	0	0	0	0	1	6	0	1	0	0	0	0	0	0
75	1	1	1	0	0	1	0	0	0	0	0	0	1	0	1	0	0	0	0	36.5	83.9	75	27.89	0	55	0	78	193	51	1.15	1	0	0	0	0	0	0	0	0	1	15	0	1	0	0	0	0	0	0
52	0	0	1	0	0	1	1	0	0	0	0	0	0	0	1	0	0	0	1	40.9	89.2	91	28.38	0	55	0	99	86	90	0.55	1	0	0	0	0	0	0	0	0	1	5	0	1	0	0	0	0	0	0
52	0	0	1	0	0	1	0	0	0	0	0	0	0	0	1	0	0	0	1	37.8	77.7	86	26.84	0	44	0	92	88	100	0.76	1	0	0	0	0	0	0	0	0	1	6	0	0	0	0	0	0	0	0
70	1	0	1	0	0	1	1	0	0	0	0	0	1	0	1	1	1	1	0	38.3	89.4	74	26.12	0	60	0	57	68	95	1.13	1	0	0	0	0	0	0	0	0	1	5	0	1	0	0	0	0	0	0
67	1	0	1	0	0	1	1	0	0	0	0	0	0	0	0	0	1	1	1	40.2	82.4	85	29.76	0	60	0	78	91	75	1.55	1	0	0	0	0	0	0	0	0	4	6	0	0	0	0	0	0	0	0
61	0	0	0	0	0	1	1	0	0	0	0	0	0	0	1	1	0	0	1	37.3	80.3	70	26.03	0	30	1	72	56	104	2.21	1	0	0	0	0	0	0	0	0	3	10	0	1	0	0	0	0	0	0
61	0	0	1	1	1	1	1	0	1	0	0	0	0	0	1	0	0	0	1	36	74.5	111	37.3	1	55	0	68	69	102	0.98	1	0	0	0	0	0	0	0	0	1	5	0	0	0	0	0	0	0	0
62	0	0	0	0	0	1	1	0	1	0	0	1	0	0	1	0	1	0	0	38	108	77	28.03	0	40	0	67	82	87	1.93	1	0	0	0	0	0	0	0	0	1	12	0	0	0	0	0	0	0	0
63	0	0	1	0	0	1	0	0	0	0	0	0	0	0	1	0	0	0	0	40.1	105	88	26.73	0	65	0	72	87	91	0.6	1	0	0	0	0	0	0	0	0	3	19	0	1	0	0	0	0	0	0
73	1	1	0	0	0	1	0	1	0	0	0	0	0	0	1	0	1	0	0	41.1	84	70	31.16	1	60	0	77	105	71	2.28	1	0	0	0	0	0	0	0	0	1	13	0	1	0	1	0	0	1	0
62	0	0	1	0	0	1	1	0	0	0	0	0	0	0	1	0	0	0	0	35.6	89.3	100	33.8	1	50	0	94	106	81	1.08	1	0	0	0	0	0	0	0	0	2	6	0	1	0	0	0	0	0	0
66	1	0	0	0	0	1	0	0	0	1	0	0	0	0	1	0	0	0	0	33.7	98.9	75	28.93	0	55	0	92	163	47	1.91	1	0	0	0	0	0	0	0	0	1	7	0	1	0	0	0	0	0	0
68	1	0	1	0	0	1	0	0	0	0	0	0	0	0	1	0	0	0	0	33	93	85	27.1	0	65	0	103	118	64	1.62	0	1	0	0	0	0	0	0	0	1	6	0	0	0	0	0	0	0	0
76	1	1	1	0	0	1	0	0	0	1	0	0	0	1	1	0	1	1	0	33.5	78.5	105	33.9	1	45	0	107	126	61	2.72	1	0	0	0	0	0	0	0	0	9	6	0	1	0	1	0	1	0	0
70	1	0	1	0	0	1	0	0	0	0	0	0	0	0	1	0	0	0	0	40.5	73.1	91	33.71	1	45	0	88	94	78	1.36	1	0	0	0	0	0	0	0	0	3	4	0	0	0	0	0	0	0	0
64	0	0	1	0	0	1	0	0	0	0	0	0	0	0	1	0	0	0	0	31.4	109	108	33.1	1	48	0	104	113	75	1.15	1	0	0	0	0	0	0	0	0	1	8	0	0	0	0	0	0	0	0
70	1	0	1	0	0	1	1	0	0	0	0	1	0	1	1	0	0	0	1	38	94.7	73	25.86	0	50	0	113	157	46	2.34	1	0	0	0	0	0	0	0	0	4	10	0	1	0	1	0	0	1	0
73	1	1	1	1	0	1	1	0	0	0	0	0	0	0	1	0	0	0	0	34.4	122	79	28.03	0	55	0	84	78	87	0.97	1	0	0	0	0	0	0	0	0	1	6	0	1	0	0	0	0	0	0
81	1	1	1	0	0	1	0	0	0	1	0	0	0	0	1	0	1	0	0	42.8	66.7	77	24.77	0	42	0	134	114	62	3.12	1	0	0	0	0	0	0	0	0	1	5	0	1	0	0	0	0	0	0
67	1	0	1	0	0	1	1	0	1	0	0	1	1	0	1	0	1	0	0	40.2	96.7	91	29.39	0	57	0	89	83	90	2.8	0	1	0	0	0	0	0	0	0	3	7	0	0	0	1	0	0	0	0
65	0	0	0	0	0	1	0	0	0	0	0	1	0	0	1	0	0	0	0	34.3	106	66	29.33	0	55	0	72	82	84	1.07	1	0	0	0	0	0	0	0	0	1	6	0	1	0	0	0	0	0	0
66	1	0	0	0	0	1	0	0	0	0	0	0	0	0	1	1	0	1	0	36.7	76.2	67	28.25	0	42	0	70	70	97	1.89	1	0	0	0	0	0	0	0	0	3	4	0	0	0	0	0	0	0	0
66	1	1	1	0	0	1	1	0	0	0	0	0	0	0	1	0	0	0	1	37.4	104	91	31.02	1	50	0	94	103	85	1.21	1	0	0	0	0	0	0	0	0	1	10	0	0	0	0	0	0	0	0
68	1	1	1	0	0	1	1	0	0	0	0	0	0	0	1	0	1	0	0	39.4	100	102	33.95	1	40	0	103	100	68	1.61	1	0	0	0	0	0	0	0	0	1	6	0	1	0	0	0	0	0	0
68	1	1	1	0	0	1	0	0	0	0	0	0	0	0	1	0	0	0	0	35	93.9	85	26	0	60	0	82	97	69	0.94	1	0	0	0	0	0	0	0	0	1	8	0	1	0	0	0	0	0	0
70	1	0	1	1	0	1	1	1	0	1	1	0	0	0	1	0	0	0	1	36.1	91.2	69	23.86	0	33	1	148	436	34	5.42	1	0	0	0	0	0	0	0	0	21	9	1	1	1	1	1	0	1	1
64	0	0	1	0	0	1	0	0	0	0	0	0	1	0	1	0	1	0	0	35.4	90.5	70	23.85	0	40	0	88	73	97	1.44	0	1	0	0	0	0	0	0	0	1	6	0	0	0	0	0	0	0	0
58	0	0	1	0	0	1	0	0	0	0	0	0	0	0	1	0	0	0	1	38.5	86.5	87	28.08	0	46	0	73	85	104	0.76	1	0	0	0	0	0	0	0	0	1	6	0	0	0	0	0	0	0	0
62	0	0	1	0	0	1	0	0	0	1	0	1	0	0	1	1	1	1	0	41	92.8	80	26.45	0	64	0	134	200	45	3.98	0	1	0	0	0	0	0	0	0	5	3	0	0	0	0	0	0	0	0
74	1	1	1	0	0	1	1	0	0	0	0	0	0	0	1	0	0	0	0	41.8	96.9	79	29.56	0	50	0	96	133	61	1.52	1	0	0	0	0	0	0	0	0	1	6	0	1	0	0	0	0	0	0
74	1	1	1	0	0	1	0	0	0	0	0	1	0	0	1	0	0	0	0	34.9	85.5	62	23.03	0	41	0	90	272	87	1.94	0	1	0	0	0	0	0	0	0	9	4	0	1	0	0	0	0	0	0
63	0	0	1	0	0	1	0	0	0	0	0	0	0	0	1	0	0	0	0	34.2	91.9	82	28.08	0	60	0	84	75	94	0.6	1	0	0	0	0	0	0	0	0	1	5	0	0	0	0	0	0	0	0
64	0	0	1	1	0	1	0	0	0	0	0	0	0	0	1	0	0	0	0	36	95.5	90	30.42	1	55	0	82	103	90	0.85	1	0	0	0	0	0	0	0	0	2	6	0	0	0	0	0	0	0	0
65	0	0	1	0	0	1	0	0	0	0	0	0	0	0	0	0	0	0	0	31.8	82.2	86	28.08	0	50	0	99	101	67	1.88	1	0	0	0	0	0	0	0	0	2	7	0	1	0	0	0	0	0	0
71	1	1	0	0	0	1	1	0	0	0	0	0	0	0	0	0	0	0	0	33.3	103	76	28.26	0	55	0	90	107	57	1.27	1	0	0	0	0	0	0	0	0	3	7	0	1	0	0	0	0	0	0
61	0	0	1	0	0	1	0	0	0	0	0	0	0	0	1	0	0	0	0	38.8	82.7	65	26.23	0	50	0	83	111	80	1.23	1	0	0	0	0	0	0	0	0	4	15	0	1	0	0	0	0	0	0
67	1	0	1	0	0	1	0	1	0	0	0	0	0	0	1	0	0	0	0	35.9	82.6	104	36.41	1	52	0	60	104	73	0.91	1	0	0	0	0	0	0	0	0	1	7	0	1	0	0	0	0	0	0
63	0	0	1	0	0	1	0	0	0	0	0	0	0	0	1	0	0	0	0	37.2	81.6	112	36.42	1	50	0	80	74	93	0.83	1	0	0	0	0	0	0	0	0	1	6	0	0	0	0	0	0	0	0
63	0	0	1	0	0	1	1	0	0	1	0	1	0	0	1	0	0	1	0	35.5	86.1	73	24.82	0	55	0	126	178	44	1.41	1	0	0	0	0	0	0	0	0	2	5	0	1	0	0	0	0	0	0
61	0	0	0	0	0	1	0	0	0	0	0	0	0	0	1	0	0	0	0	35.9	88.7	74	29	0	55	0	84	84	66	0.86	1	0	0	0	0	0	0	0	0	1	6	0	1	0	0	0	0	0	0
67	1	0	0	1	0	1	1	0	1	0	0	0	0	0	1	0	0	1	0	40.6	101	76	31.64	1	60	0	55	76	93	1.44	1	0	0	0	0	0	0	0	0	1	8	0	1	0	0	0	0	0	0
60	0	0	1	0	0	0	1	0	0	0	0	0	0	0	1	0	0	0	0	36.2	97	64	25.28	0	60	0	79	72	97	0.55	1	0	0	0	0	0	0	0	0	2	4	0	0	0	0	0	0	0	0
70	1	0	1	0	0	1	0	0	0	0	0	0	0	0	1	0	0	0	0	36.1	80.8	93	30.42	1	60	0	111	110	72	0.99	1	0	0	0	0	0	0	0	0	2	8	0	0	0	0	0	0	0	0
68	1	0	1	0	0	1	0	0	0	0	0	0	0	0	1	0	1	0	0	37.6	75.5	74	23.51	0	50	0	109	82	71	1.97	1	0	0	0	0	0	0	0	0	1	7	0	1	0	0	0	0	0	0
60	0	0	1	0	0	1	1	0	0	0	0	0	0	0	1	0	0	0	0	34.6	92.2	99	26.04	0	60	0	80	80	92	0.56	1	0	0	0	0	0	0	0	0	1	5	0	0	0	0	0	0	0	0
66	1	0	1	0	0	1	1	0	0	0	0	0	0	0	1	0	0	0	0	37.5	92.2	99	35.08	1	60	0	72	181	86	0.66	1	0	0	0	0	0	0	0	0	4	16	0	1	0	0	0	0	0	0
52	0	0	1	0	0	1	1	0	1	1	0	0	0	0	1	0	1	0	0	31	76.7	106	33.02	1	60	0	70	201	57	1.81	1	0	0	0	0	0	0	0	0	3	8	0	1	0	0	0	0	0	0
68	1	0	1	1	1	1	1	0	0	0	0	0	0	0	1	0	0	0	0	41.2	64.6	96	31.74	1	55	0	80	84	92	0.84	1	0	0	0	0	0	0	0	0	2	5	0	1	0	0	0	0	0	0
66	1	0	1	0	0	1	1	0	0	0	0	0	0	0	1	1	0	0	1	37	74.6	101	33.13	1	50	0	103	93	78	1.85	1	0	0	0	0	0	0	0	0	4	2	0	0	0	0	0	0	0	0
70	1	0	1	0	0	1	1	0	0	1	0	0	0	0	1	0	1	0	0	35.6	95.6	82	30.46	1	60	0	113	116	61	1.69	1	0	0	0	0	0	0	0	0	1	16	0	1	0	0	0	0	0	0
59	0	0	1	0	0	1	0	0	0	0	0	0	0	0	1	0	0	0	1	43.9	82.4	98.2	35.38	1	55	0	78	101	101	0.55	1	0	0	0	0	0	0	0	0	1	5	0	1	0	0	0	0	0	0
65	0	0	1	1	1	1	1	0	0	0	0	0	0	0	1	1	1	0	1	33.7	84.7	97	30.3	1	60	0	105	187	48	1.77	0	0	1	0	0	0	0	0	0	2	13	0	0	0	0	0	0	0	0
65	0	0	1	0	0	1	0	0	0	0	0	0	0	0	1	0	0	1	0	40.3	93.7	70	23.51	0	66	0	67	87	98	0.64	1	0	0	0	0	0	0	0	0	1	19	0	1	1	1	0	0	1	0
53	0	0	1	0	0	1	1	0	0	0	0	0	0	0	1	0	0	0	0	39	83.6	75	27.4	0	65	0	59	99	111	0.94	0	1	0	0	0	0	0	0	0	3	11	0	1	0	1	0	0	1	0
78	1	1	1	0	0	1	1	0	0	1	0	0	0	0	1	0	0	0	0	30.2	100	85	29.39	0	30	1	178	224	38	4.73	1	0	0	0	0	0	0	0	0	1	6	0	1	0	0	0	0	0	0
69	1	0	0	0	0	1	0	0	0	1	0	1	0	0	1	0	0	0	0	39.6	87.6	69	25.28	0	50	0	70	134	62	1.64	1	0	0	0	0	0	0	0	0	1	13	0	1	0	1	0	0	1	0
67	1	0	1	0	1	1	0	1	0	0	0	0	0	0	1	0	0	0	0	41.9	92.6	103	36.93	0	52	0	70	70	93	0.82	1	0	0	0	0	0	0	0	0	1	7	0	0	0	0	0	0	0	0
73	1	1	1	0	0	1	0	0	0	0	0	1	0	0	1	0	0	0	0	41.2	85	91	31.52	1	60	0	79	95	90	0.8	1	0	0	0	0	0	0	0	0	1	16	0	1	0	0	0	0	0	0
71	1	1	0	0	0	1	0	0	0	0	0	0	0	0	1	0	0	0	0	36.4	90.6	60	21.26	0	65	0	56	54	92	1.62	0	1	0	0	0	0	0	0	0	6	4	0	1	0	0	0	0	0	0
70	1	0	0	0	0	0	0	0	0	1	0	0	0	0	1	1	1	0	0	34.7	74.9	59	23.62	0	50	0	96	104	56	2.85	1	0	0	0	0	0	0	0	0	1	18	0	1	0	0	0	0	0	0
70	1	0	1	1	0	1	1	0	0	0	0	0	0	0	1	0	0	0	0	30	108	76	34.6	1	50	0	87	77	95	1.21	1	0	0	0	0	0	0	0	0	3	3	0	1	0	0	0	0	0	0
74	1	1	0	0	0	1	0	1	0	0	0	0	0	0	1	0	0	0	0	38.1	83.6	84	32.7	1	35	1	71	86	63	0.89	1	0	0	0	0	0	0	0	0	1	6	0	1	0	0	0	0	0	0
71	1	1	1	1	0	1	0	1	0	0	0	0	0	0	1	0	0	0	0	41.6	128	77	28.28	0	60	0	102	102	71	1.23	1	0	0	0	0	0	0	0	0	1	7	0	0	0	0	0	0	0	0
68	1	0	1	0	0	1	1	0	0	0	0	0	0	0	1	0	0	0	0	47.1	115	90	32.56	1	30	1	76	66	98	1.55	1	0	0	0	0	0	0	0	0	3	5	0	0	0	0	0	0	0	0
66	1	0	1	0	0	1	1	0	0	0	0	0	0	0	1	0	0	0	0	36.4	104	88	28.09	0	55	0	68	69	94	0.66	1	0	0	0	0	0	0	0	0	4	7	0	1	0	0	0	0	0	0
60	0	0	1	1	0	1	1	0	0	0	0	1	0	0	1	0	0	0	0	33.1	79.1	96	31.35	1	40	0	90	93	93	0.91	1	0	0	0	0	0	0	0	0	1	6	0	0	0	0	0	0	0	0
76	1	1	1	0	1	1	0	1	0	0	1	1	0	0	1	1	0	0	0	37.4	97	92	31.57	1	60	0	100	380	69	2.4	1	0	0	0	0	0	0	0	0	46	0	0	1	0	1	1	1	0	1
69	1	0	1	0	0	1	0	0	0	1	0	0	0	0	1	0	0	0	0	33.4	93.2	79	29.05	0	50	0	113	146	87	0.97	1	0	0	0	0	0	0	0	0	1	33	0	1	0	0	0	0	0	0
68	1	0	1	0	0	1	0	0	0	0	0	0	0	0	1	0	0	0	0	38.3	96.2	101	33.22	1	64	0	94	105	73	1.62	0	1	0	0	0	0	0	0	0	1	8	0	0	0	0	0	0	0	0
72	1	1	1	0	0	0	0	0	0	0	0	0	0	0	1	0	0	1	0	39.9	83	63	23.64	0	66	0	85	111	81	1.05	1	0	0	0	0	0	0	0	0	1	12	0	1	0	0	0	0	0	0
66	1	0	1	1	0	1	0	0	0	0	0	0	0	0	1	0	0	0	1	33.8	94.6	72	25.82	0	20	1	106	88	96	2.4	1	0	0	0	0	0	0	0	0	1	6	0	1	0	0	0	0	0	0
71	1	1	1	0	0	1	0	0	0	0	0	0	0	0	1	0	0	0	1	35.1	85.6	100	32.28	1	45	0	64	80	102	0.93	1	0	0	0	0	0	0	0	0	1	5	0	1	0	0	0	0	0	0
62	0	0	1	0	0	1	0	0	0	0	0	0	0	0	1	0	0	0	1	40.7	77.1	92	31.83	1	55	0	66	77	100	0.59	1	0	0	0	0	0	0	0	0	2	5	0	0	0	0	0	0	0	0
55	0	0	1	0	0	0	0	0	0	0	0	0	1	0	1	1	1	0	0	39.1	69.2	91.7	31	1	50	0	93	85	90	1.16	1	0	0	0	0	0	0	0	0	3	7	0	1	0	0	0	0	0	0
53	0	0	1	0	0	1	1	0	0	0	0	0	0	0	1	0	1	0	0	34.5	108	80	23.32	0	52	0	106	115	88	0.85	1	0	0	0	0	0	0	0	0	3	7	0	1	0	0	0	0	0	0
57	0	0	1	0	0	1	1	0	0	0	0	0	0	1	1	0	0	0	0	40	85.2	87	26.47	0	47	0	101	99	60	1.2	1	0	0	0	0	0	0	0	0	1	5	0	1	0	0	0	0	0	0
82	1	1	1	0	0	1	0	0	0	0	0	0	0	0	1	0	0	0	0	39.2	80.7	71	24.86	0	65	0	92	118	69	1.4	1	0	0	0	0	0	0	0	0	1	10	0	1	0	1	0	0	1	0
64	0	0	0	0	0	1	1	0	0	0	0	0	0	0	1	1	0	0	0	39.5	128	60	25.3	0	65	0	55	118	99	1.31	0	0	1	0	0	0	0	0	0	4	27	0	1	1	1	0	0	0	0
74	1	1	1	0	0	1	0	0	0	0	0	0	0	0	1	0	0	0	0	36.3	98.3	88	28.41	0	40	0	97	105	62	2.61	0	1	0	0	0	0	0	0	0	1	5	0	0	0	0	0	0	0	0
61	0	0	1	1	0	1	0	0	0	0	0	0	1	0	1	0	0	0	1	38.3	90.4	107	31.56	1	55	0	90	114	59	0.93	1	0	0	0	0	0	0	0	0	3	10	0	0	0	1	0	0	1	0
73	1	1	1	0	0	1	0	0	0	0	0	0	0	0	1	0	0	0	0	40.4	128	66	24.16	0	60	0	101	104	63	1.08	1	0	0	0	0	0	0	0	0	1	7	0	0	0	0	0	0	0	0
62	0	0	1	0	0	1	0	0	0	0	0	1	0	0	1	0	0	0	0	34.4	107	68	23.05	0	60	0	92	102	77	1.37	0	1	0	0	0	0	0	0	0	1	8	0	1	0	0	0	0	0	0
70	1	0	0	0	0	1	0	0	0	0	0	0	0	0	1	0	0	0	0	45.1	79.7	95	28.26	0	45	0	61	84	89	1.25	1	0	0	0	0	0	0	0	0	1	8	0	1	0	0	0	0	0	0
72	1	1	1	0	0	1	1	0	0	0	0	0	0	0	1	1	1	0	1	39.6	72.9	72	27.76	0	40	0	61	64	96	1.81	1	0	0	0	0	0	0	0	0	1	10	0	1	0	0	0	0	0	0
59	0	0	1	0	0	1	1	0	0	0	0	0	0	0	1	0	0	0	0	38.4	77.8	102	34.81	1	60	0	93	95	77	1.3	0	1	0	0	0	0	0	0	0	4	35	0	1	0	0	0	0	0	0
38	0	0	1	0	0	1	0	0	0	0	0	0	0	0	1	0	0	0	1	37.7	89.9	97	31.67	1	45	0	80	99	108	0.76	1	0	0	0	0	0	0	0	0	3	3	0	1	0	0	0	0	0	0
66	1	0	1	0	0	0	0	1	0	0	0	0	0	0	1	0	0	0	0	27.7	106	75	24.26	0	60	0	93	88	74	0.89	1	0	0	0	0	0	0	0	0	1	5	0	0	0	0	0	0	0	0
68	1	0	0	0	0	1	0	0	0	0	0	0	0	0	1	0	0	0	0	32.4	77.4	82	27.44	0	40	0	77	70	68	1.59	1	0	0	0	0	0	0	0	0	1	7	0	1	0	0	0	0	0	0
63	0	0	1	0	0	1	1	0	0	0	0	0	0	0	1	0	0	0	0	38.6	93.6	60	27.68	0	65	0	62	70	101	1.04	0	1	0	0	0	0	0	0	0	1	5	0	1	0	0	0	0	0	0
67	1	0	1	0	1	1	1	0	0	1	0	0	0	0	1	0	0	0	0	39.6	98.6	101	37.02	1	55	0	173	519	34	3.26	0	1	0	0	0	0	0	0	0	6	11	0	1	1	0	0	0	0	0
68	1	0	0	0	0	1	0	1	0	0	0	0	0	0	1	0	1	0	0	32.9	110	77	31.24	1	60	0	73	77	92	1.47	1	0	0	0	0	0	0	0	0	1	9	0	1	0	0	0	0	0	0
66	1	0	1	0	0	1	0	0	0	0	0	0	0	0	1	0	0	0	0	37	86.7	81	29.73	0	40	0	83	71	95	0.9	1	0	0	0	0	0	0	0	0	3	3	0	0	0	1	1	0	0	0
74	1	1	1	0	0	0	0	0	0	0	0	1	0	0	1	0	0	0	0	37.4	89.2	75	26.23	0	70	0	81	87	87	1.42	0	1	0	0	0	0	0	0	0	1	9	0	1	0	0	0	0	0	0
64	0	0	1	0	0	1	0	0	0	0	0	0	0	0	1	0	0	0	1	35.1	83.8	104	38.2	1	45	0	98	124	72	1.15	1	0	0	0	0	0	0	0	0	1	6	0	0	0	0	0	0	0	0
76	1	1	1	0	0	1	0	0	0	0	0	0	0	0	1	0	0	0	0	39.2	75.4	94	33.3	1	55	0	97	98	85	1.18	1	0	0	0	0	0	0	0	0	2	6	0	0	1	0	0	0	0	0
75	1	1	0	1	0	1	1	0	0	0	0	0	0	0	1	1	0	0	1	37	80.1	74	32.45	1	60	0	68	77	93	1.79	0	0	1	0	0	0	0	0	0	12	46	1	1	0	1	1	1	1	0
64	0	0	0	0	0	1	1	0	0	0	0	0	0	0	1	0	0	0	1	36.1	100				60	0	60	57	97	1.33	0	1	0	0	0	0	0	0	0	2	5	0	1	0	0	0	0	0	0
70	0	0	0	0	0	1	0	0	0	0	0	0	1	0	1	0	0	0	0	30.1	108	59.5	24.56	0	40	0	79	65	84	1.69	1	0	0	0	0	0	0	0	0	1	5	0	1	0	0	0	0	0	0
50	0	0	0	0	0	1	1	0	0	0	0	0	0	0	1	1	0	0	1	33.4	139	110	36.75	1	45	0	94	103	93	1.29	1	0	0	0	0	0	0	0	0	2	4	0	0	0	0	0	0	0	0
61	0	0	1	0	0	1	0	0	0	0	0	0	0	0	1	0	0	0	0	40.8	89.4	91	32.24	1	50	0	98	104	67	1.05	1	0	0	0	0	0	0	0	0	3	9	0	0	0	1	0	0	0	0
65	0	0	1	0	0	1	0	0	0	0	0	0	0	0	1	0	1	0	1	35.7	75.4	96	31.71	1	40	0	68	75	93	1.48	1	0	0	0	0	0	0	0	0	1	6	0	0	0	0	0	0	0	0
71	1	1	1	0	0	1	0	0	0	0	0	0	0	0	1	0	1	0	1	36.8	77.9	69	25.04	0	50	0	57	72	103	1.76	1	0	0	0	0	0	0	0	0	1	8	0	1	0	0	0	0	0	0
61	0	0	1	0	0	1	0	0	0	0	0	0	0	0	1	0	0	0	0	35.3	92.4	79	26.4	0	52	0	75	73	101	0.57	1	0	0	0	0	0	0	0	0	7	5	0	0	0	0	0	0	0	0
64	0	0	0	0	0	1	0	0	0	0	0	0	0	0	1	1	0	0	0	34.5	91.9	74	30.8	1	60	0	76	87	69	1.77	0	0	1	0	0	0	0	0	0	1	6	0	1	0	0	0	0	0	0
63	0	0	1	0	0	1	1	0	0	0	0	0	0	0	1	0	0	0	0	38.6	97.1	101	33.75	1	45	0	74	72	96	0.83	1	0	0	0	0	0	0	0	0	1	4	0	0	0	0	0	0	0	0
70	1	0	1	0	0	1	0	0	0	1	0	0	1	0	1	0	0	1	0	36.4	90.4	83	27.73	0	60	0	123	397	32	2.95	0	1	0	0	0	0	0	0	0	1	6	0	0	0	0	0	0	0	0
65	1	0	1	0	0	1	0	0	0	0	0	0	0	0	1	0	0	0	0	33.4	95.5	82	29.76	0	45	0	91	88	94	0.87	1	0	0	0	0	0	0	0	0	1	4	0	1	0	0	0	0	0	0
80	1	1	1	0	0	1	0	0	0	0	0	0	0	0	1	0	0	1	0	38.9	102	75	22.64	0	50	0	75	113	78	2.09	1	0	0	0	0	0	0	0	0	1	5	0	1	0	0	0	0	0	0
70	1	0	1	0	0	1	0	0	0	0	0	0	0	0	1	0	0	0	0	37.9	92.4	78	29	0	40	0	87	100	82	1.36	1	0	0	0	0	0	0	0	0	1	5	0	1	0	0	0	0	0	0
52	0	0	1	0	0	1	0	0	0	0	0	0	0	0	1	0	0	0	0	40.7	83.9	86	31.21	1	50	0	79	97	82	1.02	1	0	0	0	0	0	0	0	0	1	15	0	1	0	1	1	0	0	0
72	1	1	1	0	0	1	0	0	0	0	0	0	0	0	1	0	0	0	0	38.9	105	94	33.3	1	60	0	82	82	82	1.05	1	0	0	0	0	0	0	0	0	1	7	0	0	0	0	0	0	0	0
72	1	1	1	0	0	1	0	1	0	0	0	0	0	0	1	0	0	0	0	37.1	105	61	25.28	0	45	0	70	82	83	1.44	1	0	0	0	0	0	0	0	0	1	6	0	1	0	0	0	0	0	0
65	0	0	0	0	0	1	0	0	0	1	0	0	0	0	1	0	0	0	0	38.9	75.3	77	31.24	1	60	0	102	217	50	1.07	1	0	0	0	0	0	0	0	0	4	4	0	0	0	0	0	0	0	0
67	1	0	1	0	0	1	0	0	0	0	0	0	0	0	1	0	1	0	1	38.8	79.1	80	25.33	0	38	0	96	95	72	2.12	1	0	0	0	0	0	0	0	0	1	5	0	0	0	0	0	0	0	0
56	0	0	1	0	0	1	0	0	0	0	0	0	0	1	1	0	0	0	0	33.7	106	70	24.22	0	40	0	64	76	103	0.76	1	0	0	0	0	0	0	0	0	1	8	0	1	0	0	0	0	0	0
68	1	0	1	1	1	1	1	0	0	1	0	0	0	0	1	0	0	0	0	36.4	77.5	106	38.47	1	60	0	89	92	78	1.13	1	0	0	0	0	0	0	0	0	4	3	0	1	0	1	0	1	0	0
45	0	0	1	0	0	1	1	0	0	0	0	0	0	0	1	0	0	0	1	44	104	77	25.14	0	60	0	107	119	64	0.75	1	0	0	0	0	0	0	0	0	4	2	0	0	0	0	0	0	0	0
62	0	0	1	0	0	1	1	0	0	0	0	0	0	0	1	0	0	0	0	31.5	81.2	90	30.42	1	65	0	79	95	74	1.41	0	1	0	0	0	0	0	0	0	1	8	0	1	0	0	0	0	0	0
60	0	0	1	0	0	1	1	0	0	0	0	0	0	0	1	0	0	0	1	42.3	112	72	23.24	0	50	0	80	63	102	0.76	1	0	0	0	0	0	0	0	0	4	1	0	0	0	0	0	0	0	0
75	1	1	1	0	0	1	1	0	0	0	0	0	0	0	1	0	0	0	0	37.7	102	85	31.22	1	60	0	91	92	75	1.15	1	0	0	0	0	0	0	0	0	1	5	0	0	0	0	0	0	0	0
77	1	1	1	0	0	1	1	0	0	1	0	0	0	0	1	0	0	1	0	28.8	114	69	26.29	0	56	0	78	102	96	0.9	1	0	0	0	0	0	0	0	0	3	7	0	1	0	1	0	1	1	0
69	1	0	1	1	0	1	1	0	1	1	0	1	0	0	1	0	0	0	0	37	96	87	30.1	1	50	0	224	387	25	5.94	1	0	0	0	0	0	0	0	0	17	7	0	1	0	1	1	1	1	0
80	1	1	1	0	0	1	0	0	0	1	0	1	0	0	1	0	0	0	0	39.6	84.7	92	35.49	1	40	0	112		54	1.8	1	0	0	0	0	0	0	0	0	0	0	0	1	0	0	0	0	0	0
74	1	1	1	0	0	1	1	0	1	0	0	0	0	0	1	0	0	0	0	33.1	88.1	87	29.07	0	55	0	138	338	40	2.72	1	0	0	0	0	0	0	0	0	7	12	0	1	0	1	0	0	1	0
60	0	0	1	0	0	1	0	0	0	0	0	0	0	0	1	0	0	0	0	39.9	87.3	87.5	28.41	0	52	0	79	73	93	0.55	1	0	0	0	0	0	0	0	0	1	5	0	0	0	0	0	0	0	0
77	1	1	0	0	0	1	0	1	0	1	0	0	1	0	1	0	0	0	0	36.8	77.7	86	33.18	0	55	0	95	204	30	2.6	1	0	0	0	0	0	0	0	0	23	103	1	1	1	1	1	0	1	1
60	0	0	0	0	0	1	1	0	0	0	0	0	0	0	1	0	0	0	0	36.4	88.6	85	28.08	0	55	0	56	50	102	0.69	1	0	0	0	0	0	0	0	0	1	6	0	1	0	0	0	0	0	0
75	1	1	1	0	0	1	0	0	0	0	0	0	0	0	1	0	0	0	0	43	94.4	81	31.25	1	60	0	94	110	69	1.97	0	1	0	0	0	0	0	0	0	1	12	0	1	0	0	0	0	0	0
76	1	1	0	0	0	1	0	0	0	0	0	0	0	0	1	0	0	0	0	31.5	76.5	56	22.72	0	60	0	62	116	61	1.46	1	0	0	0	0	0	0	0	0	1	12	0	1	0	1	0	0	1	0
79	1	1	1	0	0	1	1	0	1	0	0	0	0	0	1	0	1	0	0	31.6	93	77	24.49	0	55	0	127	170	59	5.21	0	1	0	0	0	0	0	0	0	1	5	0	1	0	0	0	0	0	0
49	0	0	1	0	0	1	0	0	0	0	0	0	0	0	1	0	0	0	1	33.5	98.4	85	31.22	1	50	0	50	66	121	0.68	1	0	0	0	0	0	0	0	0	1	6	0	0	0	0	0	0	0	0
72	1	1	1	0	0	1	0	0	0	0	0	0	0	0	1	0	0	0	0	37.4	93.2	81	23.39	0	60	0	60	81	92	0.78	1	0	0	0	0	0	0	0	0	1	5	0	0	0	0	0	0	0	0
66	1	0	0	0	0	1	0	0	0	0	0	0	0	0	1	1	0	0	0	37.8	86.8	79	27.99	0	58	0	74	81	73	3.21	0	0	1	0	0	0	0	0	0	3	4	0	1	0	0	0	0	0	0
43	0	0	1	0	0	0	0	0	0	0	0	0	0	0	1	0	0	0	1	39	124	101	34.95	1	45	0	57	81	128	0.88	1	0	0	0	0	0	0	0	0	1	6	0	0	0	0	0	0	0	0
71	1	1	1	0	0	1	0	0	0	0	0	0	0	0	1	0	0	0	0	35.6	93.7	73	27.14	0	55	0	76	81	86	0.76	1	0	0	0	0	0	0	0	0	1	7	0	1	0	0	0	0	0	0
68	1	0	0	0	0	1	0	0	0	0	0	0	0	0	1	0	0	0	0	32.4	96	65	25.08	0	65	0	88	129	59	1.17	1	0	0	0	0	0	0	0	0	2	5	0	1	0	1	0	0	1	0
61	0	0	1	0	0	1	0	0	0	0	0	0	0	0	1	1	0	1	1	35.5	121	82	27.44	0	65	0	65	71	96	0.97	0	0	1	0	0	0	0	0	0	3	5	0	1	0	1	0	1	0	0
52	0	0	0	0	0	1	1	0	0	0	0	0	0	0	1	0	1	1	1	26.8	95.4	49	19.63	0	70	0	77	80	103	2.02	0	1	0	0	0	0	0	0	0	3	7	0	1	0	0	0	0	0	0
65	0	0	0	0	0	1	1	0	0	1	1	0	0	0	1	0	0	0	0	32.3	85.7	72	27.1	0	40	0	377	667	8	2.04	1	0	0	0	0	0	0	0	0	1	9	0	1	0	0	0	0	0	0
80	1	1	1	0	0	1	0	0	0	0	0	0	0	0	1	1	0	0	0	36.9	121	78	26.99	0	60	0	114	143	52	3.82	0	0	1	0	0	0	0	0	0	2	6	0	0	0	0	0	0	0	0
75	1	1	1	0	0	1	1	0	0	0	0	0	0	0	1	0	0	1	1	38	85.6	91	32.01	1	55	0	72	102	95	1.46	0	1	0	0	0	0	0	0	0	4	4	0	1	0	0	0	0	0	0
66	1	0	1	0	0	1	0	1	0	0	0	0	0	0	1	0	0	0	1	36.7	107	90	29.73	0	45	0	89	123	62	1.21	1	0	0	0	0	0	0	0	0	3	4	0	0	0	0	0	0	0	0
63	0	0	1	0	0	1	1	0	0	0	0	0	0	0	1	0	0	0	0	34.5	78	89	30.8	1	55	0	75	87	82	0.82	1	0	0	0	0	0	0	0	0	1	4	0	0	0	0	0	0	0	0
74	1	1	1	0	0	1	0	0	0	0	0	0	0	0	1	1	1	0	1	41.3	90.5	52	21.93	0	35	1	86	152	72	4.38	0	1	0	0	0	0	0	0	0	1	7	0	1	0	0	0	0	0	0
76	1	1	0	0	0	1	0	0	0	0	0	0	0	0	1	0	0	0	0	39.5	112	67	31.62	1	60	0	99	205	66	2.52	0	1	0	0	0	0	0	0	0	5	13	1	1	1	1	0	0	1	0
65	0	0	1	0	0	1	1	0	0	0	0	0	0	0	1	0	0	0	0	39.1	115	102	31.48	1	60	0	89	89	93	0.64	1	0	0	0	0	0	0	0	0	4	3	0	1	0	0	0	0	0	0
75	1	1	1	0	0	1	1	0	0	0	0	1	0	0	1	1	0	1	0	40.3	87	74	27.51	0	58	0	147	286	30	1.98	1	0	0	0	0	0	0	0	0	6	1	0	1	0	0	0	0	0	0
62	0	0	1	0	0	1	1	0	1	1	0	0	0	0	1	1	0	0	1	43.1	112	71	22.72	0	47	0	129	205	52	2.6	0	0	1	0	0	0	0	0	0	2	7	0	1	0	0	0	0	0	0
74	1	1	1	0	0	1	1	0	0	0	0	0	0	0	1	0	0	0	0	38.8	75.6	94	36.72	1	30	1	89	117	59	4.21	0	1	0	0	0	0	0	0	0	1	6	0	1	0	0	0	0	0	0
60	0	0	1	0	0	1	0	0	0	0	0	0	1	0	1	0	0	0	1	33	90.4	70	25.1	0	25	1	63	92	101	1.24	1	0	0	0	0	0	0	0	0	1	10	0	1	0	0	0	0	0	0
79	1	1	0	0	0	1	1	0	0	1	0	0	0	0	1	0	0	0	0	38.5	72	73	30	0	60	0	170	178	27	2.74	1	0	0	0	0	0	0	0	0	1	31	0	1	0	1	0	0	0	0
70	1	0	1	0	0	1	0	0	0	0	0	0	0	0	1	0	0	0	1	44.8	83.6	99	33.86	1	55	0	76	183	95	0.74	1	0	0	0	0	0	0	0	0	1	13	0	1	1	0	0	0	0	0
66	1	0	1	1	0	1	0	0	0	0	0	0	0	0	1	0	0	0	0	33.7	131	70	24.8	0	55	0	102	94	92	0.79	1	0	0	0	0	0	0	0	0	3	3	0	1	0	1	0	0	0	0
73	1	1	1	1	1	1	1	0	1	0	0	0	1	0	1	0	0	0	0	39.3	75.6	107	35.03	1	30	1	100	148	64	2.88	1	0	0	0	0	0	0	0	0	1	6	0	1	0	0	0	0	0	0
70	1	0	1	0	0	1	0	0	0	0	0	0	0	0	1	0	0	0	0	34.7	120	89	30.44	1	48	0	105	301	20	4	0	1	0	0	0	0	0	0	0	4	4	1	1	1	1	0	0	0	1
69	1	0	1	0	0	1	0	0	0	0	0	0	0	0	1	0	0	0	0	38.8	73.6	70	24.2	0	50	0	79	353	89	0.98	1	0	0	0	0	0	0	0	0	1	13	0	1	0	1	0	0	1	0
58	0	0	1	0	0	1	1	0	0	0	0	1	0	0	1	0	0	0	0	37.9	90.6	100	35.01	1	60	0	105	91	94	0.5	1	0	0	0	0	0	0	0	0	1	5	0	0	0	0	0	0	0	0
77	1	1	1	0	0	1	0	0	0	1	0	0	0	0	1	1	1	0	1	33.7	99.7	88	28.41	0	45	0	89	267	32	4.77	0	0	0	1	0	0	0	0	0	7	7	0	1	0	1	0	1	1	0
64	0	0	1	0	0	1	0	0	0	0	0	0	1	0	1	0	0	0	0	37.6	85.2	79	28.09	0	50	0	97	92	87	0.99	0	0	0	1	0	0	0	0	0	5	3	0	1	0	0	0	0	0	0
58	0	0	0	0	0	0	1	0	0	0	0	0	0	0	0	0	0	0	1	35.9	82.1	77	28	0	62	0	71	78	98	0.69	0	0	0	1	0	0	0	0	0	1	13	0	0	0	0	0	0	0	0
53	0	0	1	0	0	1	0	0	0	0	0	0	0	1	1	0	0	0	0	27.1	136	92	25.31	0	60	0	71	89	98	0.5	0	0	0	1	0	0	0	0	0	3	3	0	1	0	0	0	0	0	0
72	1	1	0	0	0	1	0	1	0	0	0	0	0	0	1	0	0	0	0	38.8	99.2	61	23.83	0	60	0	64	77	78	1.31	0	0	0	1	0	0	0	0	0	1	28	0	1	0	1	0	1	0	0
62	0	0	1	0	0	1	1	0	0	0	0	0	0	0	0	0	0	0	1	39	104	99	33.22	1	40	0	107	170	63	1.3	0	0	0	1	0	0	0	0	0	1	11	0	0	0	0	0	0	0	0
61	0	0	1	0	0	1	1	0	0	0	0	0	0	0	1	0	0	0	0	32.1	118	101	32	1	50	0	89	96	86	0.78	0	0	0	1	0	0	0	0	0	2	4	0	0	0	1	0	1	0	0
54	0	0	1	0	0	1	0	0	0	0	0	0	0	0	1	0	0	0	1	33.1	104	75	25.6	0	45	0	82	86	106	0.76	0	0	0	1	0	0	0	0	0	1	4	0	1	1	0	0	0	0	0
66	1	0	1	0	0	1	0	0	0	0	0	0	0	0	1	0	0	0	0	34.6	124	77	25.95	0	55	0	79	105	64	0.89	0	0	0	1	0	0	0	0	0	2	9	0	0	0	0	0	0	0	0
65	0	0	1	0	0	1	1	0	0	0	0	0	0	0	0	0	0	0	1	39.9	83.6	105	35.58	1	55	0	90	100	81	0.86	0	0	0	1	0	0	0	0	0	3	4	0	0	0	1	0	0	1	0
73	1	1	1	0	0	1	0	0	0	0	0	0	1	0	1	0	0	0	0	36.2	78.3	78	29	0	55	0	90	101	75	1.08	0	0	0	1	0	0	0	0	0	14	5	0	0	0	1	0	1	0	0
64	0	0	1	0	0	1	0	0	0	0	0	0	0	0	1	0	0	0	1	36.4	72.9	86	26	0	45	0	67	56	105	0.85	0	0	0	1	0	0	0	0	0	3	1	0	0	0	0	0	0	0	0
74	1	1	1	0	0	1	1	0	0	1	0	0	0	0	0	0	0	0	1	36.1	104	93	30.4	1	45	0	96	115	54	1.52	0	0	0	1	0	0	0	0	0	1	4	0	0	0	0	0	0	0	0
70	1	0	1	0	0	1	0	0	0	0	0	0	0	0	1	0	0	0	0	37.8	82.5	99	28.33	0	40	0	104	104	73	1.36	0	0	0	1	0	0	0	0	0	3	6	0	1	1	0	0	0	0	0
61	0	0	1	0	0	1	0	0	0	0	0	0	0	0	1	0	0	0	1	41.1	82.4	82	26.43	0	55	0	85	78	89	0.6	0	0	0	1	0	0	0	0	0	3	2	0	0	0	1	0	1	0	0
73	1	1	0	0	0	1	1	0	0	0	0	0	0	0	1	0	0	0	1	39.6	89	75	32.05	1	48	0	61	58	91	1.36	0	0	0	1	0	0	0	0	0	4	9	0	1	0	0	0	0	0	0
66	1	1	1	0	0	1	0	0	0	0	0	0	0	0	1	0	0	0	0	36.7	91.8	83	29.76	0	50	0	85	82	92	0.9	0	0	0	1	0	0	0	0	0	1	12	0	0	0	0	0	0	0	0
51	0	0	1	0	0	1	1	0	0	1	0	1	0	0	1	1	0	1	1	35.9	83.2	139	42.9	1	60	0	87	163	64	1.15	0	0	0	1	0	0	0	0	0	1	9	0	0	0	0	0	0	0	0
70	1	0	1	0	0	0	0	0	0	0	0	0	1	0	1	0	0	0	0	38.2	79.9	84	24.69	0	58	0	81	92	73	0.99	0	0	0	1	0	0	0	0	0	1	10	0	0	0	0	0	0	0	0
75	1	1	1	0	0	1	1	0	0	0	0	0	1	0	1	0	0	0	0	40.8	97.4	93	30.67	1	60	0	112	153	59	1.15	0	0	0	1	0	0	0	0	0	1	9	0	0	0	0	0	0	0	0
67	1	0	1	0	0	1	1	0	1	0	0	1	0	0	1	0	0	0	0	35.9	118	60	20.95	0	50	0	100	124	67	1.77	0	0	0	1	0	0	0	0	0	1	6	0	0	0	0	0	0	0	0
70	1	0	1	0	0	1	0	0	0	0	0	0	0	0	1	0	0	0	0	39.9	94.8	90	29.73	0	55	0	74	81	87	0.66	0	0	0	1	0	0	0	0	0	1	6	0	0	0	0	0	0	0	0
57	0	0	1	0	0	1	0	0	0	0	0	0	0	0	1	1	1	0	1	39.1	86.2	69	22.28	0	40	0	89	70	100	1.17	0	0	0	1	0	0	0	0	0	4	0	0	0	0	1	1	1	0	0
57	0	0	1	0	0	1	0	1	0	0	0	0	0	0	1	0	0	0	0	38.2	78.9	80	27.68	0	60	0	79	90	82	0.67	0	0	0	1	0	0	0	0	0	3	8	0	0	0	0	0	0	0	0
62	0	0	0	0	0	1	1	1	0	0	0	0	0	0	1	0	0	0	0	32.8	111	63.5	23.08	0	56	0	78	71	79	0.99	0	0	0	1	0	0	0	0	0	1	6	0	0	0	1	0	1	0	0
68	1	0	1	0	0	1	1	0	0	1	0	0	0	0	1	0	0	0	1	35.7	82.3	74	26.99	0	60	0	89	122	89	0.7	0	0	0	1	0	0	0	0	0	1	7	0	0	0	0	0	0	0	0
61	0	0	1	0	0	1	0	0	0	0	0	0	0	0	1	0	0	0	0	34.2	106	82	26.2	0	60	0	72	72	97	0.51	0	0	0	1	0	0	0	0	0	1	7	0	0	0	0	0	0	0	0
66	1	0	0	0	0	1	0	0	0	1	0	0	0	0	1	0	0	0	0	41.4	73.3	88	26.58	0	40	0	88	89	60	1.51	0	0	0	1	0	0	0	0	0	1	6	0	0	0	0	0	0	0	0
74	1	1	1	1	0	1	1	0	0	0	0	0	0	0	1	0	0	0	0	35.5	76	72	25.81	0	45	0	91	106	72	1.83	0	0	0	1	0	0	0	0	0	1	12	0	1	0	0	0	0	0	0
63	0	0	1	0	0	1	1	0	0	0	0	0	0	0	1	0	0	0	0	35.4	84.4	99	31.6	1	60	0	81	95	96	0.6	0	0	0	1	0	0	0	0	0	1	6	0	0	0	0	0	0	0	0
74	1	1	1	0	0	1	1	0	0	1	0	0	1	0	1	0	0	0	0	41.6	78	90	28.73	0	60	0	95	142	65	1.11	0	0	0	1	0	0	0	0	0	3	2	0	0	0	0	0	0	0	0
75	1	1	0	0	0	1	0	0	0	1	0	0	0	0	1	0	0	0	0	38.1	99.7	60	25.85	0	60	0	79	106	56	1.42	0	0	0	1	0	0	0	0	0	3	5	0	0	0	0	0	0	0	0
63	0	0	1	0	0	1	0	0	0	0	0	0	0	0	1	0	0	0	0	35.9	91.9	98	32	1	60	0	117	127	78	0.82	0	0	0	1	0	0	0	0	0	1	7	0	0	0	0	0	0	0	0
64	0	0	1	0	0	1	0	0	0	0	0	1	0	0	1	0	0	0	0	29.1	93.5	70	24.8	0	50	0	65	83	92	0.85	0	0	0	1	0	0	0	0	0	1	6	0	0	0	0	0	0	0	0
74	1	1	0	0	0	1	0	0	0	0	0	0	0	0	1	0	0	0	1	35.8	86.7	58	25.1	0	65	0	72	71	87	1.03	0	0	0	1	0	0	0	0	0	1	6	0	0	0	0	0	0	0	0
54	0	0	0	0	0	1	0	0	0	0	0	0	0	0	1	0	0	0	0	38.2	94				65	0	64	60	100	0.69	0	0	0	1	0	0	0	0	0	3	11	0	0	1	1	0	0	0	0
62	0	0	1	0	0	1	1	0	0	0	0	0	0	0	1	0	0	0	1	42	63.6	76	26.3	0	50	0	82	85	93	0.8	0	0	0	1	0	0	0	0	0	7	8	0	0	0	1	0	1	1	0
74	1	1	1	0	0	1	0	0	0	0	0	1	0	0	1	0	0	0	0	34.2	82.7	85	29.41	0	60	0	79	102	86	0.74	0	0	0	1	0	0	0	0	0	1	6	0	0	0	0	0	0	0	0
79	1	1	0	0	0	1	1	0	1	1	0	0	0	0	1	0	0	0	0	39.3	76.9	83	33.25	1	60	0	108	118	47	4.86	0	0	0	1	0	0	0	0	0	3	1	0	1	0	0	0	0	0	0
54	0	0	1	0	0	1	0	0	0	0	0	0	0	0	1	0	0	0	1	36.7	75	101	34.95	1	40	0	83	69	108	0.76	0	0	0	1	0	0	0	0	0	4	3	0	0	0	1	0	1	0	0
76	1	1	0	1	0	1	0	0	0	0	0	0	0	0	1	0	0	0	0	37.6	87	75	28.23	0	65	0	83	71	72	1.81	0	0	0	1	0	0	0	0	0	1	11	0	1	0	0	0	0	0	0
63	0	0	1	0	0	1	1	0	0	1	1	0	0	0	1	0	0	0	0	41.6	82.2	101	30.85	1	50	0	100	298	45	1.12	0	0	0	1	0	0	0	0	0	84	0	0	0	1	1	1	1	1	1
53	0	0	1	0	0	1	1	0	0	0	0	0	0	0	1	0	0	0	0	30.2	104	71	20.68	0	68	0	82	99	102	0.55	0	0	0	1	0	0	0	0	0	1	5	0	0	0	0	0	0	0	0
64	0	0	1	0	0	1	0	0	0	0	0	0	0	0	1	0	0	0	0	38.1	78.2	87	29.41	0	60	0	74	95	93	0.62	0	0	0	1	0	0	0	0	0	1	8	0	0	0	0	0	0	0	0
69	1	0	1	0	0	1	0	0	0	1	0	0	1	0	1	0	0	0	0	42	72.7	120	39.18	1	30	1	108	112	64	2.15	0	0	0	1	0	0	0	0	0	1	9	0	0	0	0	0	0	0	0
78	1	1	1	1	0	1	0	0	0	0	0	0	0	0	1	0	0	1	0	38.2	84	80	31.14	1	58	0	87	85	91	1.11	0	0	0	1	0	0	0	0	0	1	8	0	0	0	1	0	0	0	0
61	0	0	1	0	0	1	0	0	0	0	0	0	0	0	1	0	0	0	0	35.4	81.4	110	34.72	1	55	0	72	58	105	0.57	0	0	0	1	0	0	0	0	0	1	5	0	0	0	1	0	1	0	0
83	1	1	1	0	0	1	0	1	0	0	0	0	0	0	1	0	0	0	0	37.4	101	92	31.46	0	60	0	107	167	51	1.44	0	0	0	1	0	0	0	0	0	1	19	0	0	0	1	0	1	0	0
59	0	0	1	0	0	1	0	0	0	0	0	1	0	0	1	0	0	0	0	35.6	115	79.5	28.85	0	65	0	83	77	95	0.55	0	0	0	1	0	0	0	0	0	1	6	0	0	0	0	0	0	0	0
41	0	0	1	0	0	1	0	0	0	0	0	0	0	0	1	0	0	0	0	32.5	126	79	26.08	0	70	0	62	65	123	0.5	0	0	0	1	0	0	0	0	0	1	6	0	0	0	0	0	0	0	0
53	0	0	1	0	0	1	0	0	0	0	0	0	0	0	1	1	0	1	0	35.1	96.7	74	26.85	0	60	0	82	73	102	0.85	0	0	0	1	0	0	0	0	0	1	6	0	0	0	0	0	0	0	0
75	1	1	0	0	0	1	1	0	0	0	0	1	0	0	1	0	0	0	0	33.6	76.1	70	27.3	0	50	0	78	76	67	1.94	0	0	0	1	0	0	0	0	0	1	4	0	0	0	0	0	0	0	0
66	1	0	0	0	0	1	1	0	0	0	0	0	0	0	0	0	0	0	0	35.4	83.6	60	25.23	0	60	0	72	72	75	1.11	0	0	0	0	1	0	0	0	0	3	4	0	1	0	0	0	0	0	0
70	1	0	1	0	0	0	0	1	0	0	0	0	0	0	0	0	0	0	0	45.2	156	59	21.8	0	25	1	109	113	87	1.98	0	0	0	0	1	0	0	0	0	2	15	0	1	0	0	0	0	0	0
71	1	1	0	0	0	1	0	0	0	0	0	0	1	0	0	0	0	0	0	34.3	83.2	65	26.84	0	60	0	73	87	71	1.28	0	0	0	0	1	0	0	0	0	1	6	0	0	0	0	0	0	0	0
66	1	0	1	1	1	1	0	1	0	0	0	0	1	0	0	0	0	0	0	41	188	74	26.12	0	33	1	101	114	82	1.47	0	0	0	0	1	0	0	0	0	1	16	0	0	0	0	0	0	0	0
74	1	1	1	0	0	1	1	0	0	0	0	0	1	0	0	0	0	0	1	37.6	111	65	24.9	0	60	0	101	231	54	2.69	0	0	0	0	1	0	0	0	0	9	176	0	1	0	1	0	1	0	0
60	0	0	1	0	0	1	1	0	0	0	0	0	0	0	0	0	0	0	1	34.3	68.4	92	26.85	0	50	0	87	104	67	1.03	0	0	0	0	1	0	0	0	0	1	6	0	0	0	0	0	0	0	0
77	1	1	1	0	0	1	0	1	0	0	0	0	1	0	0	0	0	0	0	43	86.7	81	27	0	60	0	99	106	71	1.22	0	0	0	0	1	0	0	0	0	1	9	0	0	0	0	0	0	0	0
64	0	0	1	1	1	1	1	0	0	0	0	0	0	0	0	0	0	0	0	31.8	75.8	106	34.58	1	58	0	88	138	65	1.02	0	0	0	0	1	0	0	0	0	1	8	0	1	0	0	0	0	0	0
74	1	1	1	0	0	1	0	1	0	0	0	0	0	0	1	0	0	0	0	34.8	95.3	98	30.93	1	60	0	82	107	63	1.11	0	0	0	0	1	0	0	0	0	1	10	0	1	0	0	0	0	0	0
62	0	0	0	0	0	1	1	0	0	0	0	0	0	0	0	0	0	0	0	29.5	106	83	30.82	1	65	0	58	70	81	0.89	0	0	0	0	1	0	0	0	0	1	10	0	1	0	1	0	0	1	0
76	1	1	1	1	0	1	0	0	0	0	0	0	0	0	0	0	0	0	0	40.6	121	94.5	31.5	1	60	0	68	100	73	1.43	0	0	0	0	1	0	0	0	0	3	4	0	0	0	0	0	0	0	0
68	1	0	0	0	0	1	1	0	0	0	0	0	0	0	0	0	0	0	0	40.9	43.8	70	28	0	65	0	63	97	76	1.18	0	0	0	0	1	0	0	0	0	1	12	0	1	0	0	0	0	0	0
75	1	1	0	0	0	0	0	0	0	0	0	0	0	0	0	0	0	0	1	38.8	85.3	54	24	0	55	0	66	73	70	1.43	0	0	0	0	1	0	0	0	0	1	6	0	1	0	0	0	0	0	0
73	1	1	0	0	0	1	1	0	0	0	0	0	0	0	0	0	0	0	0	42.3	80.1	73	28.44	0	60	0	71	108	66	1.35	0	0	0	0	1	0	0	0	0	1	7	0	0	0	0	0	0	0	0
76	1	1	1	0	0	1	0	0	0	1	0	0	0	0	0	0	0	0	0	36.1	108	70	25.91	0	50	0	96	112	56	1.62	0	0	0	0	1	0	0	0	0	1	9	0	1	0	0	0	0	0	0
49	0	0	1	0	0	0	0	0	0	0	0	0	0	0	0	0	0	0	1	37.1	91.3	65	22.32	0	60	0	85	82	96	0.5	0	0	0	0	1	0	0	0	0	1	7	0	1	0	0	0	0	0	0
70	1	0	1	0	0	1	0	0	0	0	0	0	0	0	0	0	0	0	0	42.5	90.5	81	24.07	0	75	0	105	113	69	1	0	0	0	0	1	0	0	0	0	2	10	0	0	0	0	0	0	0	0
75	1	1	1	0	0	1	0	0	0	0	0	0	0	0	0	0	0	0	1	43.9	79.2	73	28.81	0	60	0	67	127	65	1.15	0	0	0	0	1	0	0	0	0	1	6	0	1	0	0	0	0	0	0
71	1	1	1	1	0	1	1	0	0	0	0	0	0	0	1	0	0	0	0	31.5	117	73	26.45	0	60	0	80	76	87	0.92	0	0	0	0	1	0	0	0	0	5	2	0	1	0	0	0	0	0	0
73	1	1	0	0	0	1	1	0	1	0	0	0	0	0	0	0	0	0	0	42.6	79.9	74	33	1	60	0	52	63	95	1.42	0	0	0	0	1	0	0	0	0	1	13	0	1	0	0	0	0	0	0
77	1	1	1	0	0	1	0	0	0	0	0	0	0	0	0	0	0	1	0	39.1	92.3	70	26.03	0	60	0	108	165	58	1.22	0	0	0	0	1	0	0	0	0	3	10	0	1	0	0	0	0	0	0
45	0	0	1	0	0	1	0	0	0	0	0	0	0	0	0	0	0	0	0	41.8	80.1	74	24.16	0	60	0	101	100	79	0.75	0	0	0	0	1	0	0	0	0	3	3	0	0	0	0	0	0	0	0
64	0	0	0	1	1	1	0	0	0	0	0	0	0	0	0	0	0	0	0	38.5	90.4	81	30.38	1	40	0	52	58	101	1.28	0	0	0	0	1	0	0	0	0	3	10	0	1	0	0	0	0	0	0
65	0	0	0	0	0	1	0	0	0	0	0	0	0	0	0	1	0	0	0	37.1	103	80	28	0	65	0	61	165	76	2.42	0	0	0	0	1	0	0	0	0	2	5	0	0	0	0	0	0	0	0
46	0	0	1	0	0	1	0	0	0	0	0	0	0	0	0	0	0	0	0	30.5	96.6	82	26	0	60	0	96	93	90	1.48	0	0	0	0	1	0	0	0	0	3	21	0	1	1	0	0	0	0	0
60	0	0	1	0	0	0	0	0	0	0	0	0	0	0	0	0	0	0	0	36.1	66.2	78	29.7	0	50	0	104	97	97	0.76	0	0	0	0	1	0	0	0	0	6	7	0	0	0	1	0	0	1	0
69	1	0	1	0	0	1	0	0	0	0	0	0	0	0	0	0	0	0	0	40.6	110	77	26.37	0	50	0	82	108	68	1.33	0	0	0	0	1	0	0	0	0	2	8	0	1	0	0	0	0	0	0
55	0	0	0	1	1	1	1	0	0	1	0	0	0	0	0	0	0	0	0	37.6	89.2	100	41.62	1	65	0	67	106	96	0.84	0	0	0	0	1	0	0	0	0	1	5	0	1	0	0	0	0	0	0
63	0	0	0	0	0	1	0	1	0	0	0	0	0	0	0	0	0	0	1	43.6	87.3	66	30.13	1	55	0	51	87	62	1.02	0	0	0	0	1	0	0	0	0	5	14	0	1	0	1	0	1	0	0
63	0	0	0	0	0	1	0	0	0	0	0	0	0	0	0	0	0	0	1	37.5	86.6	54	21.63	0	53	0	86	74	75	1.02	0	0	0	0	1	0	0	0	0	2	5	0	1	0	0	0	0	0	0
53	0	0	1	0	0	1	0	0	0	0	0	0	0	0	0	0	0	0	0	31	83.9	104	30.19	1	65	0	88	104	71	0.75	0	0	0	0	1	0	0	0	0	1	5	0	0	0	0	0	0	0	0
60	0	0	0	0	0	1	0	0	0	0	0	0	0	0	0	0	0	0	0	44.7	94.2	92	30.05	1	60	0	72	117	57	0.94	0	0	0	0	1	0	0	0	0	1	6	0	0	0	0	0	0	0	0
63	0	0	1	0	0	1	1	0	0	0	0	0	1	1	0	0	0	0	0	37.2	105	79	19.24	0	55	0	80	95	82	0.82	0	0	0	0	1	0	0	0	0	1	7	0	1	0	0	0	0	0	0
67	1	0	0	0	0	0	0	0	0	0	0	0	0	0	0	0	0	0	0	38.4	76.7	66	23.11	0	70	0	51	61	97	0.85	0	0	0	0	1	0	0	0	0	1	11	0	1	0	0	0	0	0	0
77	1	1	1	0	0	1	0	0	0	0	0	1	0	0	0	0	0	0	1	35.1	77.3	79	26.99	0	60	0	96	102	62	1.22	0	0	0	0	1	0	0	0	0	1	2	0	0	0	0	0	0	0	0
71	1	1	1	0	0	1	0	1	0	0	0	0	0	0	0	0	0	0	0	39.7	72.4	97	32.04	1	45	0	80	147	86	1.04	0	0	0	0	1	0	0	0	0	4	6	0	1	0	0	0	0	0	0
51	0	0	0	0	0	0	0	0	0	0	0	0	0	1	0	0	0	0	0	37.3	71.6	105	37.71	1	60	0	78	106	65	0.94	0	0	0	0	1	0	0	0	0	6	5	0	0	0	1	0	1	1	0
64	0	0	1	0	0	1	1	0	0	0	0	1	0	0	1	0	0	0	0	30.2	119	83	30.86	1	60	0	97	90	81	0.84	0	0	0	0	1	0	0	0	0	1	6	0	0	0	0	0	0	0	0
73	1	1	1	0	0	1	1	0	0	0	0	0	0	0	1	0	0	0	0	34.4	85.6	117	36.3	1	60	0	81	78	106	0.81	0	0	0	0	1	0	0	0	0	5	2	0	1	0	1	0	1	0	0
56	0	0	1	0	0	0	0	0	0	0	0	1	0	0	0	0	0	0	1	41.5	91.5	76	28.28	0	40	0	87	99	74	1.03	0	0	0	0	1	0	0	0	0	1	5	0	1	0	0	0	0	0	0
72	1	1	1	1	0	0	0	0	0	0	0	0	1	0	0	0	0	0	0	38.4	76.8	83	24.32	0	60	0	86	106	60	1.28	0	0	0	0	1	0	0	0	0	1	8	0	0	0	0	0	0	0	0
70	1	0	1	0	0	1	1	0	0	0	0	0	0	0	0	0	0	0	0	37.1	102	75	25.18	0	65	0	72	88	77	1.21	0	0	0	0	1	0	0	0	0	3	8	0	1	0	0	0	0	0	0
67	1	0	1	0	0	1	0	0	0	0	0	0	0	0	0	0	0	0	0	37.7	71.7	77	26.03	0	50	0	79	83	93	0.93	0	0	0	0	1	0	0	0	0	1	4	0	1	0	0	0	0	0	0
64	0	0	0	0	0	1	0	0	0	0	0	0	0	0	0	0	0	0	0	35.6	100	60	25.81	0	60	0	69	81	67	1.05	0	0	0	0	1	0	0	0	0	1	27	0	1	0	0	0	0	0	0
59	0	0	1	0	0	1	0	0	0	0	0	0	0	0	1	0	0	0	0	45.6	73.3	90	29.05	0	65	0	91	98	93	0.56	0	0	0	0	1	0	0	0	0	1	7	0	1	0	0	0	0	0	0
64	0	0	1	0	0	1	0	1	0	0	0	0	0	0	0	0	0	0	0	39.5	87.4	82	25.06	0	60	0	79	172	59	0.84	0	0	0	0	1	0	0	0	0	4	4	1	1	1	0	0	0	0	0
55	0	0	0	0	0	1	0	0	0	0	0	0	0	0	0	0	0	0	0	40.4	67.4	98	34.72	1	55	0	70	80	91	0.69	0	0	0	0	1	0	0	0	0	1	13	0	1	0	0	0	0	0	0
67	1	0	1	0	0	0	0	0	0	0	0	1	0	0	0	0	0	0	0	41.7	96.6	78	24.1	0	65	0	74	123	53	0.92	0	0	0	0	1	0	0	0	0	1	11	0	1	0	0	0	0	0	0
54	0	0	1	0	0	0	0	0	0	0	0	0	0	0	0	0	0	0	0	37.8	87.5	81	30.86	1	65	0	85	92	102	0.56	0	0	0	0	1	0	0	0	0	1	31	0	1	0	0	0	0	0	0
63	0	0	1	0	0	0	0	0	0	0	0	0	0	0	0	0	0	0	0	35.3	99	81.5	27.02	0	55	0	69	82	97	0.61	0	0	0	0	1	0	0	0	0	5	8	0	0	0	0	0	0	0	0
74	1	1	1	0	0	1	0	1	0	0	0	0	0	0	1	1	0	0	0	36.3	76.8	77	28.63	0	65	0	85	128	64	1.9	0	0	0	0	1	0	0	0	0	2	12	0	0	0	0	0	0	0	0
70	1	0	0	1	1	1	0	0	0	0	0	0	0	0	1	0	0	0	0	48.3	79.5	102	39	1	60	0	67	62	95	1.11	0	0	0	0	1	0	0	0	0	4	6	0	1	0	0	0	0	0	0
77	1	1	0	0	0	1	1	0	0	0	0	0	1	0	0	0	0	0	0	38.6	74.4	77	29	0	55	0	77	199	64	1.51	0	0	0	0	1	0	0	0	0	7	13	0	0	0	1	0	1	0	0
73	1	1	0	0	0	1	0	0	0	0	0	0	0	0	1	0	0	0	0	36	76.1	57	24.9	0	65	0	87	134	90	1	0	0	0	0	1	0	0	0	0	2	8	0	1	0	0	0	0	0	0
77	1	1	1	0	0	1	0	0	0	0	0	0	0	0	0	0	0	0	0	35.4	97	57	21.83	0	60	0	120	177	57	1.22	0	0	0	0	1	0	0	0	0	1	7	0	1	1	0	0	0	0	0
54	0	0	1	0	0	0	0	0	0	0	0	0	0	0	0	0	0	0	0	39.5	108	77	25.1	0	70	0	80	89	85	0.5	0	0	0	0	1	0	0	0	0	1	10	0	1	1	0	0	0	0	0
38	0	0	1	0	0	1	0	0	0	0	0	0	0	0	0	0	0	0	0	32.8	101	73	28.16	0	65	0	77	64	124	0.5	0	0	0	0	1	0	0	0	0	1	4	0	0	0	0	0	0	0	0
37	0	0	1	0	0	0	0	0	0	0	0	0	0	0	0	0	0	0	0	41.5	80.1	91	28.4	0	30	1	68	73	134	1.5	0	0	0	0	1	0	0	0	0	1	7	0	0	0	0	0	0	0	0
42	0	0	0	1	0	0	0	0	0	0	0	0	0	0	0	0	0	0	1	36.1	93.5	50	20.26	0	65	0	71	64	108	0.75	0	0	0	0	1	0	0	0	0	2	4	0	1	0	0	0	0	0	0
79	1	1	1	0	0	1	0	0	0	1	0	0	0	0	1	0	0	0	0	43.5	79.4	67	24.61	0	45	0	151	254	38	3.03	0	0	0	0	1	0	0	0	0	2	16	0	1	0	0	0	0	0	0
73	1	1	1	1	1	1	0	1	0	0	0	1	0	0	0	0	0	0	0	36.1	89.4	104	36.71	1	60	0	70	87	82	1.31	0	0	0	0	1	0	0	0	0	1	6	0	1	0	0	0	0	0	0
71	1	1	1	0	0	1	0	0	0	0	0	0	0	0	0	0	0	0	0	37.8	84.1	73	25.51	0	65	0	76	93	91	0.69	0	0	0	0	1	0	0	0	0	1	5	0	0	0	0	0	0	0	0
72	1	1	0	1	1	1	0	0	0	0	0	1	0	0	0	0	0	0	0	37.6	93.7	63	25.84	0	65	0	56	73	86	1.17	0	0	0	0	1	0	0	0	0	1	5	0	0	0	0	0	0	0	0
45	0	0	1	0	0	1	0	0	0	0	0	0	0	0	0	0	0	0	0	35.8	100	59	19	0	65	0	82	115	107	0.5	0	0	0	0	1	0	0	0	0	1	6	0	0	0	0	0	0	0	0
71	1	1	0	0	0	1	0	0	0	0	0	0	0	0	0	0	0	0	0	37.6	97.6	72	25.61	0	44	0	67	82	63	1.53	0	0	0	0	1	0	0	0	0	4	12	0	1	0	0	0	0	0	0
65	0	0	1	0	0	1	0	1	0	0	0	0	0	1	0	0	0	0	0	38.3	103	73	26.37	0	65	0	72	83	94	0.64	0	0	0	0	1	0	0	0	0	5	5	0	0	0	0	0	0	0	0
71	1	1	1	1	1	1	0	1	0	0	0	0	1	0	1	0	0	0	1	38.3	102	104	29.67	0	35	1	86	108	81	1.69	0	0	0	0	1	0	0	0	0	4	3	0	1	0	1	0	1	0	0
70	1	0	1	0	0	1	0	1	0	0	0	0	0	0	0	0	0	0	0	36.5	87.1	90	29.05	0	55	0	98	105	74	1	0	0	0	0	1	0	0	0	0	2	8	0	1	0	0	0	0	0	0
69	1	0	0	0	0	1	1	0	0	0	0	0	0	0	0	0	0	0	0	37.6	79.6	85	35.38	1	60	0	87	190	65	1.21	0	0	0	0	1	0	0	0	0	6	16	0	0	0	0	0	0	0	0
64	0	0	1	0	0	1	1	0	0	0	0	0	0	0	0	0	0	0	0	37.3	70.2	93	29.35	0	67	0	56	74	97	0.63	0	0	0	0	1	0	0	0	0	1	18	0	0	0	0	0	0	0	0
72	1	1	1	0	0	1	1	0	0	0	0	0	0	0	1	0	0	1	0	40.1	71.1	82	27.1	0	55	0	84	94	87	0.78	0	0	0	0	1	0	0	0	0	2	7	0	1	0	0	0	0	0	0
75	1	1	1	0	0	1	0	0	0	0	0	0	0	0	0	0	0	0	0	33.7	122	71	24.57	0	65	0	80	100	88	0.85	0	0	0	0	1	0	0	0	0	1	9	0	0	0	0	0	0	0	0
67	1	1	1	0	0	0	0	0	0	0	0	0	0	0	0	0	0	0	0	36.5	74.3	93	31.31	1	35	1	93	247	64	2.04	0	0	0	0	1	0	0	0	0	7	24	1	1	0	1	0	0	0	0
50	0	0	1	0	0	1	1	0	0	0	0	0	0	0	0	0	0	0	0	38.8	92.6	95	26.68	0	35	1	105	166	54	1.03	0	0	0	0	1	0	0	0	0	3	5	0	1	1	0	0	0	0	0
67	1	0	1	0	0	1	0	0	0	0	0	1	0	0	0	0	0	0	0	34.3	81.4	72	25.1	0	60	0	74	87	93	0.68	0	0	0	0	1	0	0	0	0	1	5	0	1	0	0	0	0	0	0
66	1	0	1	0	0	1	0	0	0	0	0	0	0	0	0	0	0	0	0	37.6	98.4	76	26.96	0	65	0	75	81	87	0.66	0	0	0	0	1	0	0	0	0	1	5	0	1	0	0	0	0	0	0
67	1	0	0	1	0	1	0	0	0	0	0	0	0	0	0	0	0	0	0	46.4	71.1	73	33.33	1	40	0	85	211	90	1.39	0	0	0	0	1	0	0	0	0	9	14	0	1	0	1	0	1	1	0
50	0	0	1	1	0	1	0	0	0	0	0	0	0	0	0	0	0	0	0	29.5	116	114	29.75	0	55	0	88	113	103	0.55	0	0	0	0	1	0	0	0	0	4	2	0	1	0	0	0	0	0	0
56	0	0	1	0	0	0	0	0	0	0	0	0	0	0	0	0	0	0	0	35.5	98.2	85	30.48	1	65	0	81	89	102	0.5	0	0	0	0	1	0	0	0	0	1	5	0	0	0	0	0	0	0	0
58	0	0	1	0	0	0	0	0	0	0	0	0	0	0	0	0	0	0	0	44.4	107	60	23.14	0	65	0	80	106	101	0.69	0	0	0	0	1	0	0	0	0	1	10	0	1	0	0	0	0	0	0
68	1	0	1	0	0	1	1	0	0	0	0	0	0	0	0	0	0	0	0	39	66.7	64	24.91	0	50	0	80	77	94	0.96	0	0	0	0	1	0	0	0	0	1	12	0	0	0	0	0	0	0	0
67	1	0	0	0	0	1	0	0	0	0	0	0	0	0	0	0	0	0	0	38.7	97.7	66	24.17	0	65	0	73	87	67	1.14	0	0	0	0	1	0	0	0	0	1	12	0	1	0	1	0	0	1	0
57	0	0	1	1	1	1	1	1	0	0	0	0	0	0	1	0	0	0	1	37.1	77.8	117	40.4	1	35	1	108	99	95	0.92	0	0	0	0	1	0	0	0	0	5	9	0	1	0	0	0	0	0	0
61	0	0	1	0	0	1	0	0	0	0	0	0	0	0	0	0	0	0	0	34	103	81	25.47	0	65	0	96	83	100	0.52	0	0	0	0	1	0	0	0	0	1	5	0	0	0	0	0	0	0	0
56	0	0	1	0	0	0	0	0	0	0	0	0	0	0	0	0	0	1	0	35.8	111	77	29	0	60	0	79	80	95	0.56	0	0	0	0	1	0	0	0	0	1	6	0	0	0	0	0	0	0	0
40	0	0	1	0	0	0	0	0	0	0	0	0	0	0	0	0	0	0	0	33.6	93.5	69	23.39	0	38	0	76	77	109	0.69	0	0	0	0	1	0	0	0	0	1	7	0	1	0	0	0	0	0	0
56	0	0	1	0	0	0	0	0	0	0	0	0	0	0	0	0	0	0	0	32.2	93.9	77	26.35	0	65	0	65	66	118	0.56	0	0	0	0	1	0	0	0	0	1	7	0	0	0	0	0	0	0	0
71	1	1	0	1	1	1	1	0	0	1	1	1	1	0	0	0	0	0	0	37.5	86.3	91	35.5	1	55	0	218	428	19	2.66	0	0	0	0	1	0	0	0	0	15	15	1	1	0	1	1	1	1	0
71	1	1	0	0	0	1	0	0	0	0	0	0	0	0	1	0	0	0	0	34.6	79.9	72	25.56	0	60	0	81	98	62	1.28	0	0	0	0	1	0	0	0	0	5	5	0	1	0	1	0	1	0	0
49	0	0	0	0	0	0	0	0	0	0	0	0	0	0	0	0	0	0	0	31.2	130	45	29	0	66	0	56	54	106	0.62	0	0	0	0	1	0	0	0	0	1	11	0	0	0	0	0	0	0	0
67	1	0	1	0	0	1	1	0	0	0	0	0	0	0	0	0	0	0	0	36.2	76.1	91	29.54	0	60	0	68	76	95	0.68	0	0	0	0	1	0	0	0	0	1	5	0	0	0	0	0	0	0	0
77	1	1	0	0	0	1	0	0	0	0	0	0	0	0	0	0	0	0	0	43.2	83	94	32.11	1	60	0	97	115	60	1.51	0	0	0	0	1	0	0	0	0	1	19	0	1	0	0	0	0	0	0
34	0	0	1	0	0	1	0	0	0	0	0	0	0	0	0	0	0	0	0	33.9	110	79	26.06	0	55	0	99	96	89	0.56	0	0	0	0	1	0	0	0	0	1	7	0	0	0	0	0	0	0	0
62	0	0	1	0	1	1	0	0	0	0	0	1	0	1	1	0	0	0	0	38.7	91.2	91	32.42	1	42	0	76	67	99	0.88	0	0	0	0	1	0	0	0	0	2	3	0	1	0	0	0	0	0	0
66	1	0	1	0	0	1	0	0	0	0	0	0	0	0	0	0	0	0	1	41.1	135	87	29.05	0	45	0	73	97	82	1.22	0	0	0	0	1	0	0	0	0	7	12	0	0	0	1	0	0	0	0
73	1	1	0	0	0	1	0	0	0	0	0	0	1	0	0	0	0	0	0	39.2	71.1	59	24	0	60	0	72	95	76	1.35	0	0	0	0	1	0	0	0	0	1	14	0	1	0	0	0	0	0	0
78	1	1	0	1	0	1	0	0	0	0	0	0	0	1	0	0	0	0	0	43	84.5	66	25	0	60	0	55	68	90	1.39	0	0	0	0	1	0	0	0	0	3	7	0	1	0	0	0	0	0	0
70	1	0	1	0	0	1	0	0	0	0	0	0	0	0	0	0	0	0	0	37.5	73.2	96	39.45	1	62	0	71	88	87	0.74	0	0	0	0	1	0	0	0	0	2	6	0	1	0	0	0	0	0	0
67	1	0	0	0	0	1	0	0	0	0	0	0	0	0	0	0	0	0	0	36.8	106	55	22.31	0	60	0	73	88	64	1.14	0	0	0	0	1	0	0	0	0	1	7	0	1	0	0	0	0	0	0
63	0	0	1	0	0	1	0	0	0	0	0	0	0	0	0	0	0	0	0	32.7	119	79	27.68	0	60	0	134	238	42	1.42	0	0	0	0	1	0	0	0	0	1	8	0	1	0	0	0	0	0	0
72	1	1	0	1	0	1	1	0	0	0	0	0	0	0	0	0	0	0	0	37.5	99.7	82	35.49	1	55	0	92	129	66	1.43	0	0	0	0	1	0	0	0	0	1	6	0	1	0	0	0	0	0	0
66	1	0	0	0	1	1	1	0	0	0	0	0	0	0	0	0	0	0	0	38.4	97.6	85	35.69	1	60	0	85	150	64	1.34	0	0	0	0	1	0	0	0	0	5	3	0	1	0	0	0	0	0	0
69	1	0	1	0	0	1	1	1	0	0	0	0	0	0	0	0	0	0	0	37.4	87.3	89	28.09	0	60	0	82	135	88	0.72	0	0	0	0	1	0	0	0	0	3	29	0	1	1	1	0	0	1	0
71	1	1	0	0	0	1	0	0	0	0	0	0	1	0	0	0	0	0	0	39	106	67	25.7	0	60	0	89	117	58	1.28	0	0	0	0	1	0	0	0	0	4	7	0	1	0	0	0	0	0	0
56	0	0	1	0	0	1	0	0	0	0	0	0	0	0	0	0	0	0	0	37.2	91	96	27.71	0	56	0	83	160	88	0.56	0	0	0	0	1	0	0	0	0	1	7	0	1	0	0	0	0	0	0
63	0	0	1	0	0	1	0	0	0	0	0	0	0	1	0	0	0	0	0	39	93.5	71	25.56	0	60	0	73	81	100	0.61	0	0	0	0	1	0	0	0	0	1	5	0	1	0	0	0	0	0	0
69	1	0	1	1	0	1	0	1	0	0	0	1	0	0	1	0	0	0	0	33.1	76.1	106	31.17	1	65	0	79	188	75	1.17	0	0	0	0	1	0	0	0	0	8	5	0	1	1	1	1	1	1	0
71	1	1	1	1	1	1	0	0	0	0	0	0	0	0	0	0	0	0	0	38.6	84.6	92	30.07	1	60	0	92	94	84	1.24	0	0	0	0	1	0	0	0	0	1	6	0	0	0	0	0	0	0	0
58	0	0	1	0	0	1	0	0	0	0	0	0	0	0	0	0	0	0	0	45.2	86.8	87	24.93	0	60	0	77	80	94	0.5	0	0	0	0	1	0	0	0	0	1	6	0	0	0	0	0	0	0	0
51	0	0	1	0	0	1	0	0	0	0	0	0	0	0	0	0	0	0	0	34.7	79.4	85	28.08	0	30	1	89	90	95	1.24	0	0	0	0	1	0	0	0	0	4	6	0	1	0	0	0	0	0	0
64	0	0	0	0	0	1	1	0	0	0	0	0	0	0	0	0	0	0	1	39.2	69.6	73	29.27	0	64	0	68	69	101	0.7	0	0	0	0	1	0	0	0	0	3	3	0	1	0	0	0	0	0	0
65	0	0	0	0	0	1	0	0	0	0	0	1	0	0	0	0	0	0	0	33.1	86.4	65	28.95	0	55	0	100	94	94	0.8	0	0	0	0	1	0	0	0	0	5	9	0	1	1	0	0	0	0	0
73	1	1	1	0	0	1	0	0	0	0	0	0	0	0	0	0	0	0	0	35.7	109	82	28	0	60	0	93	141	70	0.98	0	0	0	0	1	0	0	0	0	1	8	0	1	1	0	0	0	0	0
68	1	0	1	0	0	1	0	0	0	0	0	0	0	0	0	0	0	0	0	37	84	80	32.42	1	60	0	68	73	91	0.63	0	0	0	0	1	0	0	0	0	1	13	0	0	0	0	0	0	0	0
78	1	1	1	0	0	1	0	0	0	1	0	0	0	0	1	0	0	0	0	33.5	101	82	30.12	1	60	0	129	397	68	1.25	0	0	0	0	1	0	0	0	0	10	4	0	1	0	0	0	0	0	0
70	1	0	0	1	0	0	1	0	0	0	0	0	0	0	0	0	0	1	0	43.8	80.9	70	28.76	0	60	0	78	104	68	1.35	0	0	0	0	1	0	0	0	0	1	8	0	1	0	0	0	0	0	0
68	1	0	1	0	0	1	0	0	0	0	0	0	0	0	0	0	0	0	0	36.9	73.9	80	28.34	0	60	0	76	83	83	0.95	0	0	0	0	1	0	0	0	0	1	7	0	0	1	0	0	0	0	0
70	1	0	1	1	1	1	1	0	0	0	0	0	0	0	0	0	0	0	0	40.9	82.6	121	36.01	1	55	0	109	108	76	1.21	0	0	0	0	1	0	0	0	0	3	9	0	0	0	0	0	0	0	0
38	0	0	0	0	0	0	0	0	0	0	0	0	0	0	0	0	0	0	1	35.7	106	108	32.8	1	65	0	63	73	108	0.62	0	0	0	0	1	0	0	0	0	1	10	0	0	0	0	0	0	0	0
60	0	0	1	0	0	1	1	0	0	0	0	0	0	0	0	0	0	0	0	36.8	103	75	26.12	0	60	0	84	69	87	0.56	0	0	0	0	1	0	0	0	0	1	6	0	1	0	0	0	0	0	0
51	0	0	1	1	1	1	0	0	0	0	0	0	0	0	0	0	0	0	0	33.9	91.2	92	31.89	1	55	0	84	585	93	0.67	0	0	0	0	1	0	0	0	0	6	13	0	1	0	1	0	0	1	0
72	1	1	0	0	0	1	0	0	0	0	0	0	0	0	0	0	0	0	0	32	142	81	34	1	65	0	51	74	92	0.97	0	0	0	0	1	0	0	0	0	1	6	0	1	0	0	0	0	0	0
68	1	0	0	0	0	1	1	0	0	0	0	0	0	0	0	0	0	0	0	40.8	80.4	75	29	0	60	0	95	167	53	1.18	0	0	0	0	1	0	0	0	0	3	7	0	1	0	0	0	0	0	0
44	0	0	1	0	0	0	0	0	0	0	0	0	0	0	0	0	0	0	0	33.4	106	86	26.54	0	60	0	81	83	101	0.5	0	0	0	0	1	0	0	0	0	1	6	0	1	0	0	0	0	0	0
66	1	0	1	1	0	1	1	0	0	0	0	0	0	0	0	0	0	0	0	34	100	71	27.51	0	60	0	80	92	88	0.8	0	0	0	0	1	0	0	0	0	3	4	0	1	0	0	0	0	0	0
68	1	0	1	0	0	1	1	0	0	0	0	1	0	0	1	0	0	0	0	38.9	95.1	94	32.07	1	60	0	74	91	90	0.7	0	0	0	0	1	0	0	0	0	1	6	0	0	0	1	0	0	1	0
68	1	0	1	0	0	1	1	0	0	0	0	0	0	0	1	0	0	0	0	40.3	83.6	87	28.09	0	60	0	87	104	79	0.95	0	0	0	0	1	0	0	0	0	2	5	0	1	0	0	0	0	0	0
46	0	0	1	0	0	0	0	0	0	0	0	0	0	0	0	0	0	0	0	30	115	78	25.4	0	54	0	70	65	108	0.5	0	0	0	0	1	0	0	0	0	1	7	0	0	0	0	0	0	0	0
66	1	0	0	0	0	1	0	0	0	0	0	0	0	0	0	0	0	0	0	42.3	92	79	34.65	1	60	0	89	99	72	0.89	0	0	0	0	1	0	0	0	0	1	8	0	0	0	0	0	0	0	0
72	1	1	0	0	0	1	0	0	0	0	0	0	0	0	0	0	0	0	0	40.3	89.9	79	28.34	0	60	0	58	82	96	0.97	0	0	0	0	1	0	0	0	0	12	5	1	1	1	1	0	0	1	0
65	0	0	0	0	1	1	1	0	1	0	0	0	0	1	0	0	0	0	0	39	81.9	102	45.33	1	55	0	58	141	95	1.14	0	0	0	0	1	0	0	0	0	1	8	0	1	0	0	0	0	0	0
71	1	1	0	1	0	1	0	0	0	0	0	0	0	0	0	1	0	0	0	42	68.9	79	33.31	1	55	0	80	104	79	2.17	0	0	0	0	1	0	0	0	0	1	7	0	1	0	0	0	0	0	0
68	1	0	1	0	0	1	1	0	0	0	0	0	0	0	0	0	0	0	0	39.2	82.8	107	37.47	1	56	0	90	89	80	0.95	0	0	0	0	1	0	0	0	0	1	6	0	0	0	0	0	0	0	0
74	1	1	1	1	0	1	0	1	0	0	0	0	0	0	0	0	0	0	0	37.4	83.2	97	34.37	1	60	0	82	95	73	1.35	0	0	0	0	1	0	0	0	0	1	13	0	0	0	0	0	0	0	0
72	1	1	0	0	0	1	0	0	0	0	0	0	0	0	0	0	0	0	0	40.8	87	91.4	34.21	1	60	0	77	108	90	0.97	0	0	0	0	1	0	0	0	0	1	14	0	1	0	0	0	0	0	0
53	0	0	0	0	0	0	0	0	0	0	0	0	0	0	0	0	0	0	0	38.5	89	81	30.12	1	60	0	69	56	103	0.69	0	0	0	0	1	0	0	0	0	4	6	0	1	0	0	0	0	0	0
71	1	1	1	0	0	1	1	0	0	0	0	0	1	0	1	0	1	1	1	38.8	123	91	29.22	0	50	0	78	122	56	2.38	0	0	0	0	1	0	0	0	0	1	6	0	0	0	0	0	0	0	0
66	1	0	0	0	0	1	1	0	0	0	0	0	0	0	0	0	0	0	0	38.4	91.8	86	32.74	1	60	0	75	100	75	1.34	0	0	0	0	1	0	0	0	0	2	5	0	1	0	0	0	0	0	0
64	0	0	0	0	0	1	1	0	0	0	0	0	1	0	0	0	0	0	0	37.6	95	79	32.46	1	60	0	86	166	58	1.05	0	0	0	0	1	0	0	0	0	1	6	0	1	0	0	0	0	0	0
71	1	1	1	0	0	1	1	0	0	0	0	0	0	0	0	0	0	0	0	38.1	76	87	33.15	1	50	0	275	289	60	1.41	0	0	0	0	1	0	0	0	0	1	7	0	0	0	0	0	0	0	0
56	0	0	1	0	0	1	0	1	0	0	0	0	0	0	0	0	0	0	0	33.5	114	88	28.41	0	60	0	98	182	74	0.68	0	0	0	0	1	0	0	0	0	1	5	0	1	0	0	0	0	0	0
71	1	1	0	1	0	1	1	0	0	0	0	0	1	0	0	0	0	0	0	39.5	89.2	92	35.06	1	50	0	93	106	57	1.75	0	0	0	0	1	0	0	0	0	1	7	0	1	0	0	0	0	0	0
76	1	1	1	0	0	1	1	0	0	0	0	0	1	0	1	0	0	0	0	36.8	97.4	74	24.34	0	50	0	82	125	79	1.19	0	0	0	0	1	0	0	0	0	3	10	0	1	0	0	0	0	0	0
63	0	0	1	1	0	1	0	0	0	0	0	0	0	0	0	0	0	0	0	39.9	80.3	93.5	31.9	1	63	0	85	133	92	0.73	0	0	0	0	1	0	0	0	0	1	7	0	0	0	0	0	0	0	0
62	0	0	1	0	0	1	1	0	0	0	0	0	0	0	1	0	0	0	0	39.1	103	88	29.75	0	60	0	81	74	100	0.73	0	0	0	0	1	0	0	0	0	1	12	0	1	0	0	0	0	0	0
64	0	0	1	0	0	1	0	1	0	0	0	0	0	0	1	0	0	0	0	40	83.4	93	28.08	0	45	0	82	162	73	1.15	0	0	0	0	1	0	0	0	0	5	30	1	1	1	1	0	0	1	0
78	1	1	0	0	0	1	0	0	0	0	0	0	1	0	0	0	0	0	0	35.8	89	57	20.94	0	65	0	67	101	75	2.95	0	0	0	0	1	0	0	0	0	1	6	0	1	0	0	0	0	0	0
75	1	1	0	0	0	1	0	0	0	0	0	0	0	0	1	0	0	0	0	36.9	72.9	91	43.28	1	65	0	82	234	83	1.43	0	0	0	0	1	0	0	0	0	4	15	0	1	0	1	0	0	0	0
78	1	1	0	0	0	1	1	0	0	0	0	0	0	0	0	0	0	0	0	47.6	102	85	37.72	1	60	0	75	61	85	1.65	0	0	0	0	1	0	0	0	0	4	12	0	1	0	0	0	0	0	0
58	0	0	1	0	0	0	0	0	0	0	0	0	0	0	0	0	0	0	0	36.4	86.7	86	27.79	0	70	0	90	126	83	0.75	0	0	0	0	1	0	0	0	0	1	13	0	0	1	0	0	0	0	0
71	1	1	0	0	0	1	0	0	0	0	0	0	0	0	1	0	0	0	0	41.1	77.6	73	28.24	0	50	0	64	62	93	1.29	0	0	0	0	1	0	0	0	0	1	7	0	1	0	0	0	0	0	0
49	0	0	1	0	0	1	0	0	0	0	0	0	0	0	0	0	0	0	0	36.7	93.2	90	28.09	0	60	0	82	127	92	0.5	0	0	0	0	1	0	0	0	0	8	9	0	1	0	1	0	1	1	0
76	1	1	0	0	0	1	1	0	0	1	0	0	0	0	0	0	0	0	0	41.2	87.3	76	31.05	1	60	0	91	151	51	1.19	0	0	0	0	1	0	0	0	0	1	7	0	0	0	0	0	0	0	0
73	1	1	0	1	0	1	1	0	0	0	0	0	0	0	1	0	0	0	1	39.8	83.1	81	32.86	1	55	0	74	103	88	1.21	0	0	0	0	1	0	0	0	0	1	8	0	1	0	0	0	0	0	0
57	0	0	1	0	0	1	1	0	0	0	0	0	0	0	0	0	0	0	0	33.5	103	94	30.35	1	55	0	73	69	107	0.56	0	0	0	0	1	0	0	0	0	2	5	0	0	0	0	0	0	0	0
63	1	0	1	0	0	1	0	0	0	0	0	0	0	0	1	0	0	0	1	40.9	79.7	76	27.64	0	60	0	75	92	93	0.61	0	0	0	0	1	0	0	0	0	1	5	0	1	0	0	0	0	0	0
73	1	1	1	0	0	0	1	0	0	0	0	0	0	1	1	0	0	0	0	39.8	80.7				55	0	92	101	74	1.09	0	0	0	0	1	0	0	0	0	4	10	0	1	0	0	0	0	0	0
55	0	0	1	0	0	1	1	0	0	0	0	0	0	0	1	0	0	0	0	39.4	74.4	107	36.17	1	64	0	73	94	99	0.56	0	0	0	0	1	0	0	0	0	1	6	0	0	0	0	0	0	0	0
79	1	1	0	0	0	1	0	0	0	0	0	0	0	0	0	0	0	0	0	34.2	104	67	24.91	0	70	0	79	88	74	1.6	0	0	0	0	1	0	0	0	0	1	10	0	1	0	1	0	1	1	0
70	1	0	1	0	0	1	0	0	0	0	0	0	1	0	1	0	0	0	1	43.2	71.8	98	32.6	1	20	1	124	184	61	3.02	0	0	0	0	1	0	0	0	0	12	23	0	1	0	1	0	0	1	0
68	1	0	0	0	0	1	0	0	0	0	0	0	0	0	0	0	0	0	0	39.1	83.9	83	33.67	1	60	0	88	119	71	1.18	0	0	0	0	1	0	0	0	0	2	3	0	1	0	0	0	0	0	0
63	0	0	0	0	0	1	0	0	0	0	0	0	0	0	0	0	0	0	0	41.2	86.6	94	31.77	1	58	0	62	57	105	0.68	0	0	0	0	1	0	0	0	0	1	7	0	0	0	0	0	0	0	0
65	0	0	1	0	0	1	0	1	0	1	0	0	0	0	0	0	0	0	0	42.7	94	62	21.97	0	60	0	104	97	81	0.87	0	0	0	0	1	0	0	0	0	3	3	0	1	0	0	0	0	0	0
49	0	0	1	0	0	0	0	0	0	0	0	0	0	0	0	0	0	0	0	36.4	101	82	25.03	0	70	0	87	82	102	0.5	0	0	0	0	1	0	0	0	0	2	4	0	0	0	0	0	0	0	0
53	0	0	1	0	0	0	0	0	0	0	0	0	0	0	0	0	0	0	1	41.4	78.3	87	30.82	1	60	0	73	80	103	0.56	0	0	0	0	1	0	0	0	0	1	6	0	0	0	0	0	0	0	0
69	1	0	1	0	0	1	0	0	0	0	0	1	0	0	0	0	0	0	0	47.6	82.9	79	29.01	0	65	0	97	95	92	0.72	0	0	0	0	1	0	0	0	0	1	6	0	0	0	0	0	0	0	0
68	1	0	0	0	0	1	0	0	0	0	0	0	0	0	0	0	0	0	0	32.6	106	66	28.57	0	70	0	51	49	104	0.87	0	0	0	0	1	0	0	0	0	1	7	0	1	0	0	0	0	0	0
50	0	0	1	0	0	1	0	0	0	0	0	0	0	0	0	0	0	0	0	30.7	94.1	68	24.98	0	60	0	75	69	106	0.5	0	0	0	0	1	0	0	0	0	2	8	0	1	0	0	0	0	0	0
39	0	0	1	0	0	0	0	0	0	0	0	0	0	0	0	0	0	0	0	35.9	79	94.7	27.08	0	50	0	64	59	122	0.76	0	0	0	0	1	0	0	0	0	1	7	0	0	0	0	0	0	0	0
59	0	0	0	0	0	1	0	1	0	0	0	0	0	0	0	0	0	0	0	37.3	86.6	98	41.02	1	65	0	71	119	72	0.94	0	0	0	0	1	0	0	0	0	1	10	0	0	0	0	0	0	0	0
73	1	1	1	0	0	1	1	0	0	1	0	0	0	0	0	0	0	0	0	35.1	98.1	89	29.39	0	60	0	152	273	33	1.88	0	0	0	0	1	0	0	0	0	5	2	0	1	0	0	0	0	0	0
65	0	0	1	0	0	1	1	0	0	0	0	0	0	0	0	0	0	0	0	38.2	83.6	90	26.83	0	65	0	73	78	100	0.64	0	0	0	0	1	0	0	0	0	1	5	0	0	0	0	0	0	0	0
68	1	0	1	0	0	1	0	0	0	0	0	0	0	0	0	0	0	0	0	41.2	78.2	87	31.96	1	64	0	87	106	62	0.95	0	0	0	0	1	0	0	0	0	4	8	0	0	0	0	0	0	0	0
78	1	1	1	0	0	1	1	0	0	0	0	0	0	0	0	0	0	0	0	39.2	86	108	32.25	1	50	0	104	90	95	1.27	0	0	0	0	1	0	0	0	0	1	6	0	0	0	0	0	0	0	0
65	0	0	1	0	0	1	0	0	0	0	0	0	1	0	0	0	0	0	1	36.7	96.2	76	25.69	0	50	0	98	101	76	1.19	0	0	0	0	1	0	0	0	0	1	6	0	0	0	0	0	0	0	0
24	0	0	1	0	0	0	0	0	0	0	0	0	0	0	0	0	0	0	0	38.9	107	70	28.52	0	55	0	90	88	117	0.56	0	0	0	0	1	0	0	0	0	1	3	0	0	0	0	0	0	0	0
71	1	1	1	0	1	1	0	1	0	0	0	0	1	0	0	0	0	0	0	32.8	118	89	30.81	1	65	0	87	208	61	1.24	0	0	0	0	1	0	0	0	0	6	7	1	1	1	1	0	1	0	0
65	0	0	1	0	0	1	0	0	0	0	0	1	0	0	0	0	0	0	1	41.3	81.7	85	27.76	0	50	0	82	128	82	1.19	0	0	0	0	1	0	0	0	0	1	11	0	1	0	0	0	0	0	0
64	0	0	1	0	0	1	0	0	0	0	0	0	0	0	0	0	0	0	1	39.8	76.6	92.8	30.39	1	55	0	92	115	73	0.84	0	0	0	0	1	0	0	0	0	1	6	0	1	0	0	0	0	0	0
63	0	0	1	1	0	0	1	0	0	0	0	0	0	0	0	0	0	0	1	44.9	68.1	54	17.47	0	60	0	89	99	86	0.73	0	0	0	0	1	0	0	0	0	2	6	0	1	0	0	0	0	0	0
75	1	1	1	1	0	1	0	1	0	0	0	0	0	0	1	0	0	0	0	32.9	78.3	115	32.24	1	50	0	106	130	85	1.57	0	0	0	0	1	0	0	0	0	1	32	0	1	0	1	0	0	0	0
27	0	0	1	0	0	1	0	0	0	0	0	0	0	0	0	0	0	0	0	33.6	85.9	94	28.38	0	68	0	89	98	122	0.5	0	0	0	0	1	0	0	0	0	1	6	0	0	0	0	0	0	0	0
73	1	1	1	0	0	1	0	0	0	0	0	0	1	0	1	0	0	0	0	35.6	92.8	72	24.62	0	60	0	69	83	89	0.81	0	0	0	0	1	0	0	0	0	1	5	0	0	0	0	0	0	0	0
67	1	0	0	0	0	1	0	0	0	0	0	1	0	0	0	0	0	0	0	38.4	103	77	30.46	1	55	0	57	125	94	0.85	0	0	0	0	1	0	0	0	0	1	10	0	0	0	0	0	0	0	0
74	1	1	0	0	0	1	0	1	0	0	0	0	0	0	0	0	0	0	0	34.4	90.6	73	30.78	1	60	0	81	99	80	1.39	0	0	0	0	1	0	0	0	0	1	16	0	1	1	1	0	0	1	0
51	0	0	1	0	1	0	0	0	0	0	0	0	0	0	0	0	0	1	0	33.7	80.4	114	38.53	1	60	0	83	93	108	0.56	0	0	0	0	1	0	0	0	0	1	5	0	0	0	0	0	0	0	0
72	1	1	1	0	0	1	0	0	0	0	0	0	0	0	0	0	0	0	0	36.6	107	98	35.14	1	60	0	77	96	70	1.06	0	0	0	0	1	0	0	0	0	1	6	0	0	0	0	0	0	0	0
55	0	0	1	0	0	1	0	0	0	0	0	0	0	0	0	0	0	0	0	30.4	114	78	28.31	0	60	0	83	93	102	0.5	0	0	0	0	1	0	0	0	0	2	5	0	1	1	0	0	0	0	0
38	0	0	1	0	0	0	0	0	0	0	0	0	0	0	0	0	0	0	0	37.2	128	97	31.31	1	60	0	74	71	117	0.5	0	0	0	0	1	0	0	0	0	1	6	0	0	0	0	0	0	0	0
60	0	0	1	0	0	1	1	0	0	0	0	0	0	0	1	1	0	1	1	34.7	112	81	25.56	0	60	0	118	102	76	1.28	0	0	0	0	1	0	0	0	0	1	5	0	1	0	0	0	0	0	0
50	0	0	1	0	0	0	1	0	0	0	0	0	0	0	0	0	0	0	1	39.3	100	62	27	0	25	1	73	90	111	1.24	0	0	0	0	1	0	0	0	0	2	3	0	1	0	0	0	0	0	0
82	1	1	1	0	0	1	0	0	0	0	0	0	0	0	0	0	0	0	0	35	85.6	91.5	30.57	1	55	0	82	200	69	1.4	0	0	0	0	1	0	0	0	0	2	12	0	1	0	1	0	0	0	0
44	0	0	1	0	0	1	1	0	1	0	0	0	0	0	0	0	0	0	1	39	85.4	73	23.55	0	60	0	63	58	124	0.71	0	0	0	0	1	0	0	0	0	1	6	0	1	0	0	0	0	0	0
63	0	0	1	0	0	0	1	0	0	0	0	0	0	0	0	0	0	0	0	37.6	112	83	29.41	0	65	0	88	101	84	0.82	0	0	0	0	1	0	0	0	0	3	5	0	0	0	0	0	0	0	0
71	1	1	0	0	0	1	1	0	0	0	0	0	0	0	0	0	0	1	0	39.5	65.6	55	31.16	1	50	0	53	112	90	1.29	0	0	0	0	1	0	0	0	0	2	7	0	1	0	0	0	0	0	0
55	0	0	1	0	0	0	0	1	0	0	0	0	0	0	0	0	0	0	0	37.4	110	67.5	24.53	0	60	0	72	77	97	0.56	0	0	0	0	1	0	0	0	0	1	8	0	0	0	0	0	0	0	0
66	1	0	1	0	0	1	0	0	0	0	0	0	0	0	1	0	0	0	1	25.8	125	65	24.17	0	50	0	100	150	87	0.9	0	0	0	0	1	0	0	0	0	2	5	0	1	0	0	0	0	0	0
73	1	1	1	0	0	1	1	0	0	0	0	0	0	0	1	0	0	0	0	36.3	81.6	91	29.41	0	70	0	96	112	73	1.08	0	0	0	0	1	0	0	0	0	1	3	0	1	0	0	0	0	0	0
82	1	1	0	0	0	1	1	0	0	0	0	0	0	0	0	0	0	0	0	35.5	93.9	88	35.75	1	65	0	98	120	47	3	0	0	0	0	1	0	0	0	0	2	7	0	1	0	0	0	0	0	0
73	1	1	0	0	0	1	0	0	0	0	0	0	0	0	0	0	0	0	1	37.7	76.8	55	24.03	0	55	0	65	74	87	1	0	0	0	0	1	0	0	0	0	7	4	0	1	0	0	0	0	0	0
62	0	0	1	1	1	1	0	0	0	0	0	1	0	0	1	0	0	0	1	40.3	73.9	75	27.1	0	50	0	78	79	104	0.97	0	0	0	0	1	0	0	0	0	1	8	0	0	0	1	0	1	0	0
64	0	0	1	0	0	1	1	0	1	0	0	0	0	0	1	0	0	0	0	35.1	91.7	103	33.25	1	50	0	98	153	63	1.64	0	0	0	0	1	0	0	0	0	1	7	0	0	0	0	0	0	0	0
75	1	1	0	0	0	1	1	0	0	0	0	0	0	0	0	0	0	0	0	40.2	96.3	63	27.69	0	65	0	62	178	59	1.43	0	0	0	0	1	0	0	0	0	1	11	0	1	0	1	0	0	1	0
49	0	0	1	0	0	1	0	0	0	0	0	0	0	0	0	0	0	0	0	34.5	79.2	86	29.76	0	60	0	76	67	112	0.5	0	0	0	0	1	0	0	0	0	1	6	0	0	0	0	0	0	0	0
73	1	1	1	1	1	1	0	1	0	0	0	0	0	0	0	0	0	0	0	39.1	105	85	30.07	1	52	0	114	120	67	1.58	0	0	0	0	1	0	0	0	0	1	6	0	0	0	1	0	1	0	0
61	0	0	1	0	0	1	0	1	0	0	0	0	0	0	0	0	0	0	0	38.9	96.6	97	29.28	0	50	0	88	95	75	1.06	0	0	0	0	1	0	0	0	0	1	11	0	0	0	0	0	0	0	0
60	0	0	1	0	0	1	0	0	0	0	0	0	0	0	0	0	0	0	1	44.2	111	68	21.95	0	40	0	92	110	95	0.76	0	0	0	0	1	0	0	0	0	8	12	1	1	1	1	0	0	1	0
76	1	1	1	0	0	1	0	0	0	0	0	0	0	0	0	0	0	0	0	36.4	94.1	70	25.71	0	60	0	73	91	71	1.19	0	0	0	0	1	0	0	0	0	3	2	0	0	0	0	0	0	0	0
45	0	0	1	0	0	1	0	0	0	0	0	0	0	0	0	0	0	0	0	40.1	127	60	23.44	0	55	0	92	93	110	0.56	0	0	0	0	1	0	0	0	0	3	4	0	1	0	0	0	0	0	0
62	0	0	1	0	0	1	0	0	0	0	0	0	0	0	0	0	0	0	1	37.9	81.6	90	32.27	0	65	0	91	90	100	0.59	0	0	0	0	1	0	0	0	0	1	6	0	0	0	0	0	0	0	0
72	1	1	0	1	0	1	1	0	0	0	0	0	0	0	0	0	0	0	0	40.3	112	96	35.56	1	50	0	74	230	68	2.16	0	0	0	0	1	0	0	0	0	2	3	0	0	0	0	0	0	0	0
70	1	0	1	0	0	0	0	0	0	0	0	1	0	0	0	0	0	0	0	39.7	97.5	82	26.47	0	56	0	79	100	90	0.74	0	0	0	0	1	0	0	0	0	1	8	0	1	0	0	0	0	0	0
66	1	0	1	0	0	1	0	0	0	0	0	0	0	0	0	0	0	0	0	35.1	102	97	29.61	0	60	0	75	120	87	0.59	0	0	0	0	1	0	0	0	0	1	6	0	1	0	0	0	0	0	0
71	1	1	1	0	0	1	0	0	0	0	0	0	0	0	1	1	0	0	0	39.5	91.6	90	30.78	1	60	0	82	264	52	1.75	0	0	0	0	1	0	0	0	0	2	3	1	0	0	1	1	0	0	1
71	1	1	0	0	0	1	0	0	0	0	0	0	0	0	0	0	0	0	0	35	92.9	70	26.03	0	65	0	75	85	74	1.28	0	0	0	0	1	0	0	0	0	1	3	0	1	0	0	0	0	0	0
64	0	0	1	0	0	1	1	0	0	0	0	0	0	0	0	0	0	0	0	36.9	92.7	110	35.51	1	57	0	76	78	91	0.56	0	0	0	0	1	0	0	0	0	1	4	0	0	0	0	0	0	0	0
31	0	0	0	0	0	0	0	0	0	0	0	0	0	0	0	0	0	0	0	29.5	110	43	19.22	0	60	0	51	43	131	1.89	0	0	0	0	0	1	0	0	0	1	7	0	1	0	0	0	0	0	0
41	0	0	1	0	0	0	0	0	0	0	0	0	0	0	0	0	0	0	0	44.8	88.2	86	29.95	0	55	0	92	79	118	1.69	0	0	0	0	0	1	0	0	0	1	8	0	0	0	0	0	0	0	0
27	0	0	1	0	0	0	0	0	0	0	0	0	0	0	0	0	0	0	0	32.2	105	87	29.41	0	75	0	90	93	101	1.69	0	0	0	0	0	1	0	0	0	1	12	0	1	0	1	0	0	0	0
78	1	1	0	0	0	1	0	1	0	1	0	0	1	0	1	0	1	0	1	33.9	83.7	51	21.5	0	65	0	140	258	31	21.24	0	0	0	0	0	1	0	0	0	24	11	0	1	0	1	1	1	1	1
48	0	0	1	0	0	0	0	0	0	0	0	1	0	0	0	0	0	1	0	33.2	82	116	34.42	1	45	0	109	131	90	2.3	0	0	0	0	0	1	0	0	0	3	15	0	1	0	0	0	0	0	0
59	0	0	1	0	0	1	0	0	0	0	0	0	1	0	0	0	0	0	0	27.4	60.8	74	22.1	0	35	1	108	111	84	2.79	0	0	0	0	0	1	0	0	0	1	14	0	1	0	0	0	0	0	0
40	0	0	1	0	0	0	0	0	0	0	0	0	0	0	0	0	0	0	0	38.8	89.6	85	28.8	0	60	0	107	105	82	2.05	0	0	0	0	0	1	0	0	0	3	7	0	1	1	0	0	0	0	0
68	1	0	0	0	0	1	0	0	0	0	0	0	0	0	0	0	0	0	0	41.2	85.3	61	24.88	0	65	0	58	94	72	3.51	0	0	0	0	0	1	0	0	0	2	13	0	1	0	1	0	0	1	0
50	0	0	1	0	0	1	0	0	0	0	0	0	0	0	0	0	0	0	0	38.2	90.2	73	21.86	0	65	0	101	93	110	1.69	0	0	0	0	0	1	0	0	0	1	10	0	1	0	1	0	0	1	0
43	0	0	0	0	0	0	0	0	0	0	0	0	0	0	0	0	0	0	0	34.7	113	70	28.4	0	60	0	52	56	111	2.09	0	0	0	0	0	1	0	0	0	1	8	0	0	0	0	0	0	0	0
49	0	0	1	0	0	0	0	0	0	0	0	0	1	0	0	0	0	0	0	36.4	94.1	86	26.84	0	50	0	96	115	81	3.09	0	0	0	0	0	1	0	0	0	3	46	0	1	0	0	0	0	0	0
33	0	0	1	0	0	0	0	0	0	0	0	0	0	0	0	0	0	0	0	40.4	104	74	22.84	0	70	0	81	76	124	1.69	0	0	0	0	0	1	0	0	0	3	4	0	0	0	0	0	0	0	0
72	1	1	1	0	0	1	0	0	0	0	0	0	0	0	1	0	0	0	0	42.1	90.5	74	25.01	0	50	0	81	83	81	4.3	0	0	0	0	0	1	0	0	0	1	13	0	0	0	0	0	0	0	0
36	0	0	0	0	0	0	0	0	0	0	0	0	0	0	0	0	0	0	0	35.4	102	58	23.33	0	60	0	71	68	131	3.56	0	0	0	0	0	1	0	0	0	1	7	0	1	0	0	0	0	0	0
67	1	0	1	0	0	1	1	0	0	0	0	0	0	0	1	1	0	0	1	34.3	121	88	29.07	0	50	0	97	148	59	2.13	0	0	0	0	0	1	0	0	0	4	0	0	0	0	1	1	1	0	1
70	1	0	1	1	1	1	1	0	0	0	0	0	1	0	1	0	0	0	1	38.7	89.5	107	35.67	1	65	0	86	94	81	1.21	0	0	0	0	0	0	0	1	0	1	7	0	1	0	0	0	0	0	0
62	0	0	0	0	0	1	0	0	0	0	0	0	0	0	0	0	0	0	1	39.1	93.9	84	28.41	0	60	0	63	80	96	0.73	0	0	0	0	0	0	0	1	0	1	9	0	1	0	0	0	0	0	0
55	0	0	1	0	0	0	0	0	0	0	0	0	0	0	1	0	0	0	1	37.1	99.8	96	23.12	0	60	0	95	258	55	0.75	0	0	0	0	0	0	0	1	0	4	31	0	1	1	1	0	0	1	0
74	1	1	0	0	0	1	0	0	0	0	0	0	0	0	1	0	0	0	0	30.7	76.8	88	30.81	1	55	0	68	89	94	1.24	0	0	0	0	0	0	0	1	0	1	7	0	0	0	0	0	0	0	0
49	0	0	1	0	0	1	0	0	0	0	0	0	0	0	0	0	0	0	0	33.8	95.8	90	29.04	0	72	0	80	74	104	9.56	0	0	0	0	0	0	0	1	0	1	6	0	0	0	0	0	0	0	0
67	1	1	0	0	0	1	0	0	0	0	0	0	0	0	0	0	0	0	0	32.4	109	54	22.03	0	70	0	66	291	79	1.64	0	0	0	0	0	0	0	1	0	4	1	1	1	0	1	0	0	0	1
71	1	1	0	0	0	0	0	0	0	0	0	1	0	0	0	0	0	0	0	34.9	111	51	19.58	0	60	0	64	73	96	0.95	0	0	0	0	0	0	0	1	0	2	7	0	1	1	1	0	0	1	0
75	1	1	1	0	0	1	0	1	0	1	0	0	1	0	1	0	0	0	0	33.6	117	78	29.52	0	60	0	101	116	69	1.15	0	0	0	0	0	0	0	1	0	5	7	0	1	0	0	0	0	0	0
73	1	1	1	0	0	0	0	0	0	0	0	1	0	0	0	0	0	0	0	39.1	87	74	24.05	0	60	0	92	91	72	1.09	0	0	0	0	0	0	0	1	0	6	15	0	1	0	0	0	0	0	0
46	0	0	1	0	0	1	0	0	0	0	0	0	0	0	0	0	0	0	0	36.9	93.9	85	25.4	0	60	0	82	76	106	0.56	0	0	0	0	0	0	0	1	0	3	4	0	1	0	0	0	0	0	0
65	0	0	1	0	0	0	0	0	0	0	0	0	0	0	0	0	0	0	0	34.3	103	72	24.77	0	67	0	81	70	97	0.64	0	0	0	0	0	0	0	1	0	1	3	0	0	0	0	0	0	0	0
53	0	0	0	0	0	1	0	0	0	0	0	0	0	0	0	0	0	0	0	33.4	110	63	22.15	0	68	0	79	71	85	0.94	0	0	0	0	0	0	0	1	0	1	5	0	1	0	0	0	0	0	0
66	1	0	0	0	0	1	1	0	0	0	0	1	1	0	0	0	0	0	0	38.6	81.3	95	32.53	1	50	0	83	128	92	1.12	0	0	0	0	0	0	0	1	0	2	14	0	1	0	0	0	0	0	0
53	0	0	1	1	0	1	1	0	0	1	1	1	0	1	1	1	1	0	1	40.1	68.2	98	36.6	1	35	1	663	981	5	3.52	0	0	0	0	0	0	0	1	0	4	10	0	1	0	0	0	0	0	0
57	0	0	1	1	0	0	0	0	0	0	0	0	0	0	0	0	0	0	0	40.6	80.9	70	22.72	0	65	0	68	85	117	0.67	0	0	0	0	0	0	0	1	0	1	6	0	0	0	0	0	0	0	0
70	1	0	1	0	0	0	1	0	0	0	0	0	1	0	0	0	0	0	0	38.1	90.7	82	28.71	0	60	0	94	116	88	0.74	0	0	0	0	0	0	0	1	0	1	13	0	0	0	0	0	0	0	0
60	0	0	1	1	0	1	0	0	0	0	0	0	0	0	1	0	0	0	0	38	66.4	105	37.2	1	58	0	91	93	79	0.91	0	0	0	0	0	0	0	1	0	4	6	0	0	0	0	0	0	0	0
48	0	0	1	0	0	1	1	0	0	0	0	0	0	1	1	0	0	0	1	43.9	145	74	26.45	0	37	0	111	173	68	1.03	0	0	0	0	0	0	0	1	0	2	6	0	1	1	0	0	0	0	0
63	0	0	1	0	0	1	0	0	0	0	0	0	0	0	0	0	0	0	0	41.2	92	60	22.5	0	65	0	85	88	84	0.82	0	0	0	0	0	0	0	1	0	1	9	0	1	0	0	0	0	0	0
69	1	0	1	0	0	1	0	1	0	0	0	0	1	0	0	0	0	0	0	37.7	104	100	31.72	1	50	0	84	114	94	0.98	0	0	0	0	0	0	0	1	0	1	13	0	0	0	0	0	0	0	0
48	0	0	0	0	0	0	0	0	0	0	0	0	0	0	0	0	0	0	0	33.9	89.7	52	20.7	0	65	0	70	59	108	0.56	0	0	0	0	0	0	0	1	0	1	7	0	1	0	0	0	0	0	0
70	1	0	1	0	0	0	0	0	0	0	0	0	0	0	1	0	0	0	0	41.5	105	65	21.38	0	65	0	75	79	89	0.74	0	0	0	0	0	0	0	1	0	1	12	0	1	0	1	0	0	1	0
76	1	1	0	1	0	1	0	0	0	0	0	1	1	0	0	0	0	0	1	44.1	71.3	91	32.01	1	70	0	71	84	69	1.31	0	0	0	0	0	0	0	1	0	2	2	0	0	0	0	0	0	0	0
72	1	1	0	1	0	1	1	0	0	0	0	0	1	0	0	1	1	0	0	36.4	84.7	65	26.51	0	60	0	85	112	70	2.68	0	0	0	0	0	0	0	1	0	6	90	1	1	1	1	0	1	0	0
77	1	1	1	0	0	1	0	0	0	0	0	0	1	0	1	0	0	0	0	33.8	84.7	105	32.28	0	60	0	96	137	55	1.22	0	0	0	0	0	0	0	1	0	1	6	0	1	0	0	0	0	0	0
72	1	1	0	0	0	1	0	0	0	0	0	0	0	0	0	0	0	0	0	36.9	86.9	94	38.54	1	70	0	74	77	67	1.32	0	0	0	0	0	0	0	1	0	8	6	0	1	0	1	0	1	0	0
82	1	1	0	0	0	1	1	0	0	0	0	1	1	0	1	0	0	0	0	36.9	88.4	60	26.75	0	65	0	71	154	78	1.74	0	0	0	0	0	0	0	1	0	1	12	0	1	0	0	0	0	0	0
66	1	0	1	0	1	1	1	0	0	0	0	0	0	0	0	0	0	0	0	36.8	112	100	32.28	1	40	0	127	108	73	1.22	0	0	0	0	0	0	0	1	0	1	6	0	1	0	0	0	0	0	0
63	0	0	1	0	0	1	0	0	0	0	0	0	0	0	0	0	0	0	0	38.1	81	85	30.48	1	65	0	98	65	102	0.61	0	0	0	0	0	0	0	1	0	4	6	0	1	0	0	0	0	0	0
68	1	0	1	1	1	1	0	0	0	0	0	1	0	1	0	0	0	0	1	36	81.8	76	23	0	25	1	113	127	61	4.74	0	0	0	0	0	0	0	0	1	2	11	0	1	0	0	0	0	0	0
29	0	0	0	0	0	0	0	0	0	0	0	0	0	0	0	0	0	0	0	32.2	106	94	31.53	1	57	0	48	64	118	1.33	0	0	0	0	0	0	0	0	1	3	21	0	1	0	0	0	0	0	0
64	0	0	0	0	0	0	0	0	0	0	0	0	0	0	0	0	0	0	0	33.9	80	60	28.83	0	65	0	82	154	64	2	0	0	0	0	0	0	0	0	1	1	31	0	1	0	0	0	0	0	0
69	1	0	1	0	0	1	0	1	0	0	0	0	0	0	0	0	0	0	0	45.5	72.1	84	28.41	0	60	0	78	118	86	1.37	0	0	0	0	0	0	0	0	1	4	12	0	0	0	1	0	1	0	0
69	1	0	1	0	0	0	0	0	0	0	0	0	0	0	1	1	0	0	0	31.5	116	72	25.01	0	60	0	68	104	96	2.33	0	0	0	0	0	0	0	0	1	4	14	0	1	0	1	0	0	0	0
51	0	0	1	0	0	1	0	1	0	0	0	0	0	0	0	0	0	0	0	40.9	81.8	98	29.98	0	56	0	69	101	111	1.07	0	0	0	0	0	0	0	0	1	5	4	0	1	1	0	0	0	0	0
38	0	0	1	0	0	0	0	0	0	0	0	0	0	0	0	0	0	0	0	40.9	88.4	79	25.8	0	70	0	83	87	109	0.96	0	0	0	0	0	0	0	0	1	1	12	0	1	0	1	0	0	1	0
69	1	0	0	0	0	1	0	1	0	0	0	0	0	0	1	0	0	0	0	39.3	87.3	84.5	31.22	1	48	0	54	59	98	2.32	0	0	0	0	0	0	0	0	1	5	3	0	1	0	0	0	0	0	0
60	0	0	1	0	0	1	0	0	0	0	0	0	0	0	0	0	0	0	0	37.3	91.7	69	24.74	0	60	0	91	84	98	1.07	0	0	0	0	0	0	0	0	1	1	11	0	0	0	0	0	0	0	0
64	0	0	1	0	0	1	0	1	0	0	0	0	0	0	0	0	0	0	1	34.5	89.1	66	22	0	65	0	72	95	94	1.19	0	0	0	0	0	0	0	0	1	1	26	0	1	0	0	0	0	0	0
70	1	0	1	0	0	1	0	0	0	1	0	0	0	0	0	0	0	1	0	34.8	86.3	105	35.91	1	55	0	103	207	62	1.91	0	0	0	0	0	0	0	0	1	5	10	0	1	0	0	0	0	0	0
58	0	0	1	0	0	1	0	0	0	0	0	0	0	0	0	0	0	0	0	33.2	95.7	97	30.3	1	45	0	85	92	79	2.43	0	0	0	0	0	0	0	0	1	4	8	0	1	0	1	0	0	1	0
48	0	0	0	0	0	1	0	0	0	0	0	0	1	0	0	0	0	0	0	34.1	76.1	84	23.67	0	60	0	59	76	101	1.33	0	0	0	0	0	0	0	0	1	1	5	0	1	0	0	0	0	0	0
64	0	0	0	0	0	1	0	0	0	0	0	0	0	0	0	0	0	0	0	32	86.1	61	21.8	0	60	0	69	74	84	1.61	0	0	0	0	0	0	0	0	1	3	22	0	1	0	0	0	0	0	0
33	0	0	1	0	0	0	0	0	0	0	0	0	0	0	0	0	0	0	0	41	96.9	102	29.46	0	50	0	81	82	113	0.96	0	0	0	0	0	0	0	0	1	1	6	0	0	0	0	0	0	0	0
64	0	0	1	0	0	1	1	0	0	0	0	0	0	0	0	0	0	0	0	41.6	75.4	94	30.96	1	50	0	73	145	99	2.78	0	0	0	0	0	0	0	0	1	1	19	0	1	0	1	0	0	0	0
43	0	0	1	0	0	1	0	0	0	0	0	0	1	0	0	0	0	0	0	37.9	81.2	111	30.11	1	35	1	113	118	78	1.96	0	0	0	0	0	0	0	0	1	9	8	0	1	0	0	0	0	0	0
52	0	0	1	0	0	0	1	0	0	0	0	0	0	0	0	0	0	0	1	35.7	123	84	22.88	0	35	1	93	82	107	1.46	0	0	0	0	0	0	0	0	1	1	8	0	1	0	0	0	0	0	0
42	0	0	1	1	0	0	0	0	0	0	0	0	0	0	0	0	0	0	1	39.1	70.1	96	25.88	0	60	0	88	83	118	1.16	0	0	0	0	0	0	0	0	1	1	21	0	1	1	0	0	0	0	0
66	1	0	0	0	0	1	0	0	0	0	0	0	0	0	0	0	0	0	0	39.7	91.6	72	26	0	60	0	73	121	56	2.11	0	0	0	0	0	0	0	0	1	2	21	0	1	0	0	0	0	0	0
62	0	0	1	0	0	1	1	0	0	0	0	0	1	0	0	0	0	0	0	33.3	80.7	92	21.68	0	60	0	83	76	93	1.13	0	0	0	0	0	0	0	0	1	1	6	0	0	0	0	0	0	0	0
72	1	1	1	0	0	1	0	0	0	0	0	0	0	0	0	0	0	0	0	32.3	91.6	74	23.45	0	50	0	261	249	57	2.47	0	0	0	0	0	0	0	0	1	8	19	0	1	0	0	0	0	0	0
67	1	0	1	0	0	1	0	0	0	0	0	1	0	0	0	0	0	0	0	38.3	90.5	78	23.39	0	50	0	67	82	91	1.77	0	0	0	0	0	0	0	0	1	1	6	0	0	0	0	0	0	0	0
57	0	0	0	0	0	0	0	0	0	0	0	0	0	0	0	0	0	0	0	36.6	110	55	21.76	0	55	0	54	68	97	1.19	0	0	0	0	0	0	0	0	1	1	34	0	1	1	1	0	0	0	0
52	0	0	1	0	0	1	0	0	0	0	0	0	0	0	1	0	0	0	0	36.5	97	78	28	0	50	0	103	96	91	1.31	0	0	0	0	0	0	0	0	1	5	8	0	1	0	0	0	0	0	0
58	0	0	1	0	0	0	0	0	0	0	0	0	0	0	0	0	0	0	0	39.8	94	78	26.75	0	60	0	84	99	76	1.44	0	0	0	0	0	0	0	0	1	1	7	0	1	0	0	0	0	0	0
52	0	0	1	0	0	0	0	0	0	0	0	0	0	0	0	0	0	0	0	40.2	93.5	75	26.42	0	65	0	81	97	75	1.3	0	0	0	0	0	0	0	0	1	1	17	0	1	0	0	0	0	0	0
72	1	1	1	0	1	1	0	0	0	0	0	1	0	0	0	0	0	0	0	36	82.1	110	35.5	1	35	1	86		77	3.29	0	0	0	0	0	0	0	0	1	1	0	0	0	0	0	0	0	0	0
68	1	0	1	0	0	1	1	0	0	0	0	0	0	0	0	0	0	0	0	36.1	108	94	32.27	1	55	0	85	98	90	1.34	0	0	0	0	0	0	0	0	1	1	6	0	0	0	0	0	0	0	0
45	0	0	0	0	0	0	0	0	0	0	0	0	0	0	0	0	0	0	0	37.5	106	59	21.11	0	70	0	63	49	117	1.19	0	0	0	0	0	0	0	0	1	1	12	0	1	0	0	0	0	0	0
66	1	0	0	0	0	1	1	0	0	0	0	0	0	0	0	0	0	0	0	34.5	80.7	65	24.91	0	50	0	75	98	68	2.87	0	0	0	0	0	0	0	0	1	1	16	0	1	0	1	0	0	1	0
58	0	0	1	0	0	0	0	0	0	0	0	0	0	0	0	0	0	0	0	36.7	77.1	82	27.36	0	60	0	86	102	81	1.3	0	0	0	0	0	0	0	0	1	1	15	0	0	0	0	0	0	0	0
67	1	0	1	0	0	0	0	0	0	0	0	0	0	0	0	0	0	0	0	35.5	101	81	26.45	0	65	0	84	156	72	1.75	0	0	0	0	0	0	0	0	1	3	8	0	1	0	0	0	0	0	0
71	1	1	1	1	1	1	0	0	0	0	0	0	0	0	0	0	0	1	0	38.2	73.3	80	27.77	0	60	0	77	84	93	1.75	0	0	0	0	0	0	0	0	1	1	7	0	0	0	0	0	0	0	0
59	0	0	1	0	0	1	0	0	0	0	0	0	0	0	0	0	0	0	0	35.1	92.4	118	33.42	1	60	0	74	76	97	1.07	0	0	0	0	0	0	0	0	1	3	14	0	1	0	0	0	0	0	0
70	1	0	1	0	0	1	0	0	0	1	0	0	1	0	1	0	0	0	0	30.5	66.3	83	27.73	0	32	1	166	257	35	5.46	0	0	0	0	0	0	0	0	1	27	0	0	0	1	1	1	1	1	1
66	1	0	1	0	0	1	1	0	0	0	0	0	0	0	1	0	0	0	1	32.9	86.9	91	27.78	0	47	0	59	87	113	1.55	0	0	0	0	0	0	0	0	1	5	6	0	1	0	0	0	0	0	0
39	0	0	1	0	0	1	0	0	0	0	0	0	0	0	0	0	0	0	0	40.6	82.3	79	26.7	0	40	0	75	69	117	1.46	0	0	0	0	0	0	0	0	1	1	9	0	1	0	0	0	0	0	0
39	0	0	1	0	0	1	0	0	0	0	0	0	0	0	0	0	0	0	0	41.8	91.3	94	27.47	0	67	0	64	80	114	1.07	0	0	0	0	0	0	0	0	1	1	34	0	1	0	0	0	0	0	0
47	0	0	1	0	0	0	0	0	0	0	0	0	0	0	0	0	0	0	1	43.1	94.4	74	23.89	0	55	0	73	74	121	1.07	0	0	0	0	0	0	0	0	1	1	7	0	1	0	0	0	0	0	0
61	0	0	1	1	0	1	0	0	0	0	0	0	0	0	0	0	0	0	0	38.7	74.6	105	35.91	1	65	0	61	72	108	1.07	0	0	0	0	0	0	0	0	1	1	7	0	0	0	0	0	0	0	0
71	1	1	0	0	0	1	0	0	0	0	0	0	0	1	0	0	0	0	0	36.4	76.7	60	24.97	0	65	0	62	77	87	1.8	0	0	0	0	0	0	0	0	1	1	13	0	1	0	1	0	0	1	0
49	0	0	1	0	0	1	1	0	0	0	0	0	0	0	0	0	0	0	0	36.7	96.7	87	28.41	0	50	0	67	110	111	1.46	0	0	0	0	0	0	0	0	1	1	5	0	1	0	0	0	0	0	0
55	0	0	1	0	0	1	0	0	0	0	0	0	0	0	0	0	0	0	0	34.4	74.1	95.9	35.71	1	55	0	90	112	104	1.07	0	0	0	0	0	0	0	0	1	18	45	1	1	1	1	0	0	1	0
57	0	0	1	0	0	1	0	0	0	0	0	0	0	0	0	0	0	0	0	40.7	91.4	92	26.01	0	45	0	121	114	64	1.96	0	0	0	0	0	0	0	0	1	1	6	0	0	0	0	0	0	0	0
70	1	0	1	0	0	1	0	1	0	0	0	1	0	0	0	0	0	0	0	36.6	100	101	34.54	1	60	0	70	65	94	1.41	0	0	0	0	0	0	0	0	1	1	10	0	1	0	0	0	0	0	0
37	0	0	1	0	0	0	0	0	0	0	0	0	0	1	0	0	0	0	0	36.8	108	85	27.14	0	70	0	89	83	96	0.96	0	0	0	0	0	0	0	0	1	1	6	0	1	0	0	0	0	0	0
63	0	0	1	0	0	1	1	0	0	0	0	0	0	0	0	0	0	0	1	35.8	83.9				40	0	143	147	45	3.66	0	0	0	0	0	0	0	0	1	1	7	0	1	0	0	0	0	0	0
77	1	1	1	0	0	1	0	0	0	0	0	0	0	0	0	0	0	0	0	39.7	79	83	29.76	0	65	0	82	113	80	2.32	0	0	0	0	0	0	0	0	1	1	3	0	1	0	0	0	0	0	0
65	0	0	1	0	0	1	0	0	0	0	0	1	0	0	0	0	0	0	0	33	87.4	103	32.28	1	64	0	84	158	61	1.66	0	0	0	0	0	0	0	0	1	22	32	1	1	1	0	0	0	0	0
57	0	0	1	1	0	1	0	0	0	0	0	0	0	0	0	0	0	0	0	34.7	88.7	93	28.09	0	60	0	86	100	95	1.16	0	0	0	0	0	0	0	0	1	1	38	0	1	0	1	0	0	1	0
77	1	1	1	0	0	0	0	1	0	0	0	0	1	0	1	0	0	0	0	36.5	92	77	25.8	0	45	0	116	147	84	3.15	0	0	0	0	0	0	0	0	1	3	6	0	1	0	0	0	0	0	0
39	0	0	0	1	0	0	0	0	0	0	0	0	0	0	0	0	0	0	0	34.9	97.6	65	20.98	0	70	0	66	68	115	1.19	0	0	0	0	0	0	0	0	1	3	12	0	1	0	0	0	0	0	0
67	1	0	1	1	0	1	0	0	0	0	0	1	0	0	0	0	0	0	0	37.3	75.3	88	27.84	0	60	0	89	94	77	2.11	0	0	0	0	0	0	0	0	1	1	18	0	1	0	0	0	0	0	0
66	1	0	1	0	0	1	1	0	0	0	0	0	1	0	0	0	0	0	0	35.9	81.3	98	28.33	0	60	0	87	79	89	1.14	0	0	0	0	0	0	1	0	0	1	5	0	0	0	0	0	0	0	0
74	1	0	0	0	0	1	0	0	0	0	0	0	1	0	0	0	0	0	0	50.1	74.6	74	33	1	64	0	73	80	94	1.77	0	0	0	0	0	0	1	0	0	2	12	0	1	0	1	0	0	1	0
68	1	0	1	0	0	1	1	0	0	1	0	0	1	0	0	0	0	0	0	38.7	86.5	87	28.41	0	58	0	96	91	80	1.62	0	0	0	0	0	0	1	0	0	1	7	0	1	0	0	0	0	0	0
55	0	0	1	0	0	1	0	0	0	0	0	0	1	0	0	1	0	1	0	34.5	101	78	25.38	0	30	1	69	78	106	3.58	0	0	0	0	0	0	1	0	0	3	6	0	0	0	0	0	0	0	0
69	1	0	1	0	0	1	0	0	0	0	0	0	0	0	0	0	0	0	0	35.2	75.6	70	21.6	0	70	0	102	107	93	1.24	0	0	0	0	0	0	1	0	0	1	10	0	0	0	0	0	0	0	0
72	1	1	1	0	0	1	1	0	0	0	0	1	1	0	0	0	0	1	0	35.6	93.2	94	30.99	1	40	0	81	147	50	2.47	0	0	0	0	0	0	1	0	0	1	19	0	0	0	1	0	0	1	0
73	1	1	0	1	1	1	1	0	0	0	0	0	0	0	0	0	0	0	0	41.8	94.5	73	29.3	0	60	0	94	109	67	2.78	0	0	0	0	0	0	1	0	0	1	14	0	0	0	0	0	0	0	0
74	1	1	1	0	0	1	1	0	0	0	0	0	1	1	0	0	0	0	0	27.2	134	77	28.67	0	60	0	72	85	71	2.38	0	0	0	0	0	0	1	0	0	6	8	0	1	0	0	0	0	0	0
22	0	0	1	0	0	0	0	0	0	0	0	0	0	0	0	0	0	0	1	36.4	114	72	21.04	0	60	0	77	71	122	0.86	0	0	0	0	0	0	1	0	0	1	8	0	0	0	0	0	0	0	0
69	1	0	0	1	0	1	0	0	0	0	0	0	1	0	0	0	0	0	0	40.9	96.6	93	38.21	1	40	0	76	88	60	3.38	0	0	0	0	0	0	1	0	0	4	7	0	1	0	1	0	1	0	0
67	1	0	1	0	0	1	1	0	0	0	0	0	1	0	0	0	0	0	0	42	87	96	33.61	1	55	0	102	122	77	1.49	0	0	0	0	0	0	1	0	0	5	5	0	1	0	1	0	1	0	0
60	0	0	0	0	0	1	0	0	0	0	0	0	1	0	0	0	0	0	0	40	100	75	30.42	1	70	0	76	65	90	1.19	0	0	0	0	0	0	1	0	0	1	8	0	0	0	0	0	0	0	0
78	1	1	1	0	0	1	0	1	0	0	0	1	1	0	1	0	0	0	0	38.6	96	79	28.67	0	65	0	79	114	71	2.15	0	0	0	0	0	0	1	0	0	1	8	0	0	0	0	0	0	0	0
74	1	1	1	0	0	1	0	0	0	1	0	0	1	0	1	0	0	0	0	39	83.9	84	27.43	0	45	0	135	220	45	4.46	0	0	0	0	0	0	1	0	0	1	5	0	0	0	0	0	0	0	0
70	1	0	1	0	0	1	1	0	0	0	0	0	1	0	0	0	0	1	0	39.4	85.8	87	29.74	0	55	0	95	90	75	1.72	0	0	0	0	0	0	1	0	0	1	6	0	0	0	0	0	0	0	0
[truncated: 15 more columns]
