# Supplementary material for: Evaluation of the Cleveland Clinic Score for predicting acute kidney injury across different elective cardiac surgeries—a retrospective study
Source: PeerJ. 2026 Jan 15;14:e20533. doi: 10.7717/peerj.20533 (PMC12812272; doi:10.7717/peerj.20533)
Supplement: Supplemental Information 2 [file peerj-14-20533-s002.xlsx]

## Sheet: Arkusz1
Age	>65	>70	Sex (Male 1, Female 0)	Asthma/COPD	Obstructive sleep apnea	Arterial hypertension	Diabetes mellitus	Impaired Glucose Tolerance	With insulin treatment	Chronic kidney injury	Dialysis	Other kidney diseases (cyst, nephrolithiasis)	Atrial fibrillation	Anemia	Coronary artery disease	Carotid Artery Disease	Peripheral artery disease	Stroke	Smoking history	pCO2 preoperative	pO2 preoperative	Weight	BMI	BMI>30	LVEF	LVEF=<35	Creatinine before surgery [umol/l]	Creatinine maximum level (µmol/l)	eGFR	EuroSCORE	CABG	CABG+AVR/AVP	CABG+CAS	MIDCAB	AVR/AVP	AVR/AVP+reoperation	AVR/AVP+LAAO	MVR/MVP	Bental de bono	Length of intensive care unit stay (days)	Length of hospital stay (days)	Return to intensive care unit	Transfusions on intensive care unit	Rethoracotomy	Pulmonary complications	Respiratory failure	NIV	Pleural fluid	Reintubation
age in years	age above 65 years	age above 70 years		history of asthma/COPD	history of OSA	history of arterial hypertension												history of stroke		pCO2 in mmHg	p)2 in mmHg	weight in kg	in kg/m2	BMI abowe 30 kg/m2	left ventricular ejection fraction
	0-no	0-no	0-female sex	0-absent	0-absent	0-absent	0-absent	0-absent	0-absent	0-absent	0-absent	0-absent	0-absent	0-absent	0-absent	0-absent	0-absent	0-absent	0-absent					0-no		0-no					0-no	0-no	0-no	0-no	0-no	0-no	0-no	0-no	0-no			0-no	0-no	0-no	0-no	0-no	0-no	0-no	0-no
	1-yes	1-yes	1-male sex	1-present	1-present	1-present	1-present	1-present	1-present	1-present	1-present	1-present	1-present	1-present	1-present	1-present	1-present	1-present	1-present					1-yes		1-yes					1-yes	1-yes	1-yes	1-yes	1-yes	1-yes	1-yes	1-yes	1-yes			1-yes	1-yes	1-yes	1-yes	1-yes	1-yes	1-yes	1-yes
[truncated: 15 more columns]
